# 1 **Monkey Pox Virus (MPXV): Phylogenomics, Host-Pathogen Interactome,** 2 **and Mutational Cascade**

3 *Roshan kumar*<sup>1\*</sup>, *Shekhar Nagar*<sup>2</sup>, *Shazia Haider*<sup>3</sup>, *Utkarsh Sood*<sup>4,5</sup>, *Kalaiarasan Ponnusamy*<sup>6</sup>,  
4 *Gauri Garg Dhingra*<sup>7</sup>, *Shailly Anand*<sup>8</sup>, *Ankita Dua*<sup>9</sup>, *Mona Singh*<sup>2</sup>, *Manisha Sengar*<sup>2</sup>, *Indrakant*  
5 *Kumar Singh*<sup>2,10\*</sup>, *Rup Lal*<sup>4\*</sup>

6  
7  
8

## 9 **Authors Affiliations:**

10

11 <sup>1</sup>*Post-Graduate Department of Zoology, Magadh University, Bodh Gaya, Bihar, 824234, India*

12 <sup>2</sup>*Department of Zoology, Deshbandhu College, University of Delhi, New Delhi, Delhi, 110019, India*

13 <sup>3</sup>*Department of Biotechnology, Jaypee Institute of Information and Technology, Uttar Pradesh, Noida, 201309, India*

14 <sup>4</sup>*The Energy and Resources Institute, New Delhi, 110003, India*

15 <sup>5</sup>*Department of Zoology, Maitreyi College, University of Delhi, New Delhi, 110021, India*

16 <sup>6</sup>*Biotechnology & Viral Hepatitis Division, National Centre for Disease Control, New Delhi, 110054, India*

17 <sup>7</sup>*Kirori Mal College, University of Delhi, Delhi, 110007, India*

18 <sup>8</sup>*Deen Dayal Upadhyaya College, University of Delhi, New Delhi, 110078, India*

19 <sup>9</sup>*Shivaji College, University of Delhi, New Delhi, 110027, India*

20 <sup>10</sup>*Institute of Eminence, Delhi School of Public Health, University of Delhi, Delhi, 110007, India*

21

22 \*Corresponding Authors: [roshanzhc@gmail.com](mailto:roshanzhc@gmail.com), [iksingh@db.du.ac.in](mailto:iksingh@db.du.ac.in), [ruplal@gmail.com](mailto:ruplal@gmail.com)

23

24

25

26

27

28

29

30

31

32

33

34

35 **Abstract**

36 While the world is still managing to recover from Covid-19 pandemic, Monkeypox awaits  
37 to bring in another global outbreak as a challenge to the entire mankind. However, Covid-  
38 19 pandemic have taught us lessons to move fast in viral genomic research to implement  
39 prevention and treatment strategies. One of the important aspects in Monkeypox virus  
40 should be immediately taken up is to gather insights of its evolutionary lineage based on  
41 the genomic studies. We have thus analysed the genome sequences of reported isolates of  
42 Monkeypox in the present study through phylogenomics. Host-pathogen interactions,  
43 mutation prevalence and evolutionary dynamics of this virus were investigated for all the  
44 documented isolates. Phylogenetic exploration revealed the clustering of strain Israel 2018  
45 (MN 648051.1) from Clade I with the four isolates reported from the recent outbreak. An  
46 in-depth scrutiny of the host-pathogen interactome identified protein E3, serine protease  
47 inhibitor-2 (SPI-2), protein K7, and cytokine response-modifying protein B (CrmB) as the  
48 major regulatory hubs. Among these, the CrmB protein ( $dN/dS \approx 1.61$ ) was detected to be  
49 operating through positive selection. It possibly attests a selective advantage with the  
50 monkeypox virus in protecting the infected cells from antiviral responses elicited by the  
51 host. Studies also revealed that CrmB protein exhibited several mutations, the majority of  
52 which were destabilizing ( $\Delta\Delta G > 0$ ). While this study identified a large number of  
53 mutations within the newly outbreak clade, it also reflected that we need to move fast with  
54 the genomic analysis of the newly detected strains from around the world to develop  
55 better prevention and treatment methods

56  
57  
58  
59  
60  
61  
62  
63  
64  
65  
66  
67  
68  
69  
70

## 71 **Introduction**

72  
73 The discovery of the first monkeypox virus (MPXV) dates back to 1959 in cynomolgus  
74 monkeys during a transit from Singapore to Denmark [1]. However, in human history the  
75 first incidence of monkeypox was reported in a 9-month unvaccinated infant in 1970 in  
76 Basankusu Territory, Democratic Republic of Congo, Central Africa [1]. Monkeypox virus  
77 (MPXV) is a double stranded DNA virus that belongs to the family Poxviridae, subfamily  
78 Chordopoxvirinae, and the genus 'Orthopoxvirus', and is a close relative of Vaccinia and  
79 Cowpox viruses [1]. The genus Orthopoxvirus includes viruses such as the Vaccinia virus,  
80 Cowpox virus, Camelpox virus, Rabbitpox virus, Horsepox virus, Ectromelia virus,  
81 Variola virus, Buffalopox virus, Akhmeta virus, etc, to name a few. Human monkeypox is  
82 a self-limiting, viral zoonotic disease found mostly in people residing in areas adjacent to  
83 the tropical rainforests, and is mainly transmitted through blood, body lesions, and fluids  
84 of infected animals, shedding of viral particles through faeces and sharing contaminated  
85 items [2]. According to World Health Organization (WHO) guidelines, the symptoms  
86 usually manifest within 6 to 13 days post infection but in some cases, the incubation may  
87 even last between 5 to 21 days. The infection can present severe symptoms especially in  
88 young children, pregnant women and immunosuppressed individuals where the fatality  
89 rate can even rise to 3-6% (<https://www.who.int/news-room/factsheets/detail/monkeypox>). Clinical manifestations are similar to smallpox as the infection  
90 is presented by fever, headache, muscle ache, backache, rashes all over the body and  
91 lymphadenopathy (swelling of lymph nodes) [3]. The enlargement of lymph nodes is  
92 exclusively observed in patients with MPXV infection and helps differentiate it from  
93 smallpox symptoms. Additionally, MPXV has been designated less severe than smallpox  
94 with a lower mortality rate.

96 Geographically, the disease has been endemic to central and western Africa, however, in  
97 the past few years, reports of human-human and nosocomial transmission have emerged  
98 that can make MPXV another potential global threat reeling under post COVID  
99 complications. In the United Kingdom, MPX has been named as High Consequence  
100 Infectious Disease (HCID) and special facilities are maintained to treat such patients [3, 4].  
101 On July 23, 2022, the World Health Organisation declared Monkeypox Public Health

102 Emergency of International Concern (PHEIC). The incidence was presumed to be associated  
103 with the import of Gambian giant rats, squirrels and dormice that transmitted the virus to  
104 prairie dogs domesticated as pets [5]. Recently, this pathogen has resurfaced and as of July  
105 22, 2022, according to the reports of the European Centre for Disease Prevention and Control,  
106 more than 18000 cases of monkeypox have been confirmed in different parts of the world  
107 including Spain, USA, Germany, United Kingdom, France and India. The sudden  
108 emergence of MPX and its widespread prevalence in more than 70 locations indicate that  
109 the virus must have been prevalent and been circulating at levels that have gone  
110 undetected by surveillance systems. Realizing this. As the spread has been attributed to  
111 travel and numbers are slowly increasing globally, the same cardinal mistakes must not  
112 be repeated and screenings of international travellers must be more rigorous this time to  
113 prevent multi-country outbreaks.

114 In order to tackle the outbreak of Monkeypox we need to move fast on several fronts and  
115 one of the aspects that really helped scientists and policy makers on case of SARS-Covid -  
116 2 pandemic was very rapid genomic analysis of strains from different geographical  
117 locations [6, 7]. Indeed, pathogen genomic studies have been very helpful in characterizing  
118 different circulating strains, identifying evolutionary links, and predicting transmission  
119 patterns. In the present study we thus attempted to analyse the phylogenetic position of  
120 the newly emerged sequenced Monkeypox virus variants within the genus  
121 Orthopoxvirus. We particularly focused on the genomic variation present at protein levels  
122 within monkeypox strains followed by the generation of an interactome between human  
123 and monkeypox virus. In addition, the amino acid level mutations in major regulatory hub  
124 proteins were analysed to determine their effect on virus structural integrity. Although  
125 results reflect that Monkeypox virus is harbour a lot of mutations, more in-depth analysis  
126 is needed as more and more genome sequences of this strain become available in near  
127 future to supplement the efforts to devise prevention and treatment strategies

128

## 129 **Materials and Methods**

### 130 **Selection of Genomes**

131 All the monkeypox virus genomes were retrieved from the NCBI database. Following  
132 retrieval of the sequences, quality assessment was performed using QUASt 5.0.2 [8] and  
133 out of the 126 genomes available, 71 high quality genomes were selected for downstream  
134 analysis including the four isolates of the year 2022 (Table 1). In order to establish the  
135 phylogenetic position, using the whole genome Single Nucleotide Polymorphism (SNP)  
136 method, all available genomes of genus Orthopoxvirus other than Monkeypox viruses  
137 were downloaded (N=100). These comprised the sequences from Cowpox viruses (N=41),  
138 Vaccinia viruses (N=30), Camelpox viruses (N=9), Akhmeta viruses (N=6), Variola viruses  
139 (N=5) and Ectromelia viruses (N=3). After the quality check, out of these 100 genomes, 85  
140 were used for SNP-based phylogeny. Finally, the phylogenetic analysis was constructed  
141 using 156 viruses, 71 genomes of MPXV and the remaining 85 genomes of viruses  
142 belonging to the genus Orthopoxvirus.

143

#### 144 **Genome Annotation**

145 The genomes of 71 Monkeypox viruses were annotated using Prokka: rapid prokaryotic  
146 genome annotation [9]. To further refine the database, the prokka-genbank\_to\_fasta\_db  
147 tool was used to generate the Monkeypox virus database. The genbank full format files of  
148 isolates namely Congo\_2003\_358, DRC\_06-1070, MPXV-WRAIR7-61, COP-58, Israel\_2018,  
149 Sudan\_2005\_01, Cote\_d'Ivoire\_1971, Liberia\_1970\_184, and Zaire-96-I-16 were  
150 downloaded from NCBI and the database was formatted. This database was further used  
151 to annotate the MPXV genomes in Prokka using --kingdom Viruses --gcode 1 flags.

152

#### 153 **Phylogeny**

154 The whole genome SNP-based phylogenetic tree was constructed using kSNP3 [10]. The  
155 optimum k-mer size of the dataset was determined using kchooser, a program that  
156 measures the diversity of sequences in the dataset. The whole genome consensus  
157 parsimony tree (-min\_frac 0.5) was constructed in kSNP3 and visualized in iTOL [11].  
158 Further, to access the similarity among the Monkeypox virus genomes, Average  
159 Nucleotide Identity was estimated using pyani [12]. The distance matrix was converted  
160 into a Neighbour Joining tree using the Ape package in R. Subsequently, the graph of the  
161 correlation matrix was plotted using the corrplot function in R. Additionally, to access the

162 similarity based on core genome, the multifasta core genome alignment was generated  
163 using PRANK [13] in Roary [14] with minimum percentage identity of 95%. The alignment  
164 file was used to construct the phylogenetic tree using the maximum likelihood statistical  
165 method and Jukes-Cantor model in Mega XI [15].

### 166 **Core genome, pangenome and functional analysis**

167 The GenBank files generated using prokka were subjected to the GET\_HOMOLOGUES  
168 package for analysing the core genome using the OrthoMCL clustering algorithms with  
169 minimum identity and query coverage of 95% [16]. Furthermore, the substitution rates at  
170 non-synonymous and synonymous sites were determined for these core genomes. Using  
171 MUSCLE v3.8.31 and HyPhy v2.2.4 [17], orthologous gene clusters were aligned and stop  
172 codons were removed. For each orthologous gene cluster, Datamonkey v2.0 [18]  
173 (<http://www.datamonkey.org/slac>) used the single-likelihood ancestor counting (SLAC)  
174 method to calculate the dN/dS value. The dN/dS values were plotted using ggplot2 in R  
175 (R Development Core Team, 2015). Genes in monkeypox viruses were also analyzed for  
176 their differential presence. A gene absence matrix was generated using GenAPI [19]. Using  
177 ggplot2 in R, only genes that showed differential abundance were plotted. Furthermore,  
178 we clustered monkeypox proteins at 95% sequence similarity and query coverage using  
179 CD-HIT [20] and the resultant pangenome protein sequences were used for host-pathogen  
180 protein-protein interaction (PPI) analysis.

181 To access the functional potential, the genes were classified into six different categories  
182 viz. virulence and infection, genetic information processing, structural proteins, cell  
183 signalling and transduction, metabolism, and hypothetical proteins (Supplementary File  
184 1). The presence of these genes was confirmed into six different categories across the  
185 different phylogenetic clades as determined by the whole genome SNP-based tree.

186

### 187 **Modeling of host-pathogen interaction network**

188 Viruses rely on interactions between host and viral proteins to carry out all their life cycle  
189 functions, including infection, replication and even the assembly of new viral particles [7].  
190 Monkeypox-virus protein sequences were submitted to HPIDB3.0 [21], the host-pathogen  
191 interaction database, to predict their direct interaction with humans as the principal host.  
192 BLASTp was used to retrieve homologous host/pathogen protein sequences [22]. For

193 high-throughput analysis, BLASTp was used to search multiple protein sequences at once,  
194 and the results were presented both in a tabular format and as sequence alignments [21,  
195 22]. Cytoscape v3.9.1 was used to construct and visualize the HPI network [23]. As the  
196 constructed network demonstrated, proteins with the highest degrees that interact with a  
197 large number of signalling proteins, played a key regulatory role as hubs. The hub proteins  
198 were identified using Network Analyzer [24], a plugin of Cytoscape v3.9.1.

199

## 200 **Computational structure analysis of key monkeypox viral protein**

201 For understanding the effects of mutations on the stability of key viral proteins,  
202 computational structural analysis was performed on the one key viral protein in the PPI  
203 network cytokine response-modifying protein B (CrmB). The computational structure of  
204 wild-type and mutant CrmB were constructed using the Phyre2 [25] and Swiss model  
205 [26]. The structure was energy minimized by the Chiron energy minimization server [27].  
206 The structure was also validated using the Ramachandran plot. The effect of the mutation  
207 was analyzed using FoldX [28]. The structures were repaired before building the mutant  
208 models. Repair protein structure helps identify those residues with poor torsion angles, or  
209 VanderWaal's classes, or total energy, and repairs them. The FoldX tool provides the  
210 difference in Gibbs energy of the protein.

211

## 212 **Results**

### 213 **General Genomic Attributes**

214 The monkeypox virus belongs to genus Orthopoxvirus with the average genome size and  
215 coding sequences of  $196.44 \pm 3.42$  Kb and  $188.57 \pm 10.43$ , respectively, whereas the average  
216 %GC was  $33.06 \pm 0.06\%$  (Table 1). The results are in consensus with previously published  
217 reports [29]. The majority of isolates studied so far have been isolated from Central & West  
218 African countries, major ones from the Democratic Republic of Congo (formerly known as  
219 Zaire), Israel, the USA, Singapore and France (Table 1). In all likelihood, the disease was  
220 transmitted via exotic animals transported from tropical rainforests to other parts of the  
221 western hemisphere [30]. Interestingly, we also examined four isolates from the current  
222 outbreak (MPX/UZ\_REGA\_1Belgium/2022, MPX/UZ\_REGA\_2Belgium/2022,  
223 MPXV\_FRA\_2022\_TLS67 and MPXV\_USA\_2022\_MA001). Two of these isolates were

224 reported from Belgium, one each from France and the USA (Table 1). The largest genome  
225 size was observed in the case of strain Sudan 2005\_01 (206.37 kb), whereas the smallest  
226 was in case of strain MPXV-M5320 M15 Bayelsa (185.31 kb), which is in agreement with  
227 the previous reports [29]. Interestingly, the highest number of coding sequences/ORFs  
228 (n=219) were seen in case of strain MPXV\_FRA\_2022\_TLS67 with a genome size of  
229 197.12kb. Out of the 71 isolates, 52 were isolated from *Homo sapiens* between the years 2005  
230 and 2022, while one each was from a wild monkey, dormouse, Gambian rat, rope squirrel  
231 and Prairie Dog (Table 1), suggesting the potential of monkeypox virus to infect a wide  
232 array of hosts.

### 233 **Phylogenetic Analysis**

234 A phylogenetic tree based on whole genome SNPs representing 16 different viruses was  
235 constructed for the members of the genus Orthopoxvirus, including Ectromelia (n=3),  
236 Orthopoxvirus Abatino (n=1), Akhmeta (n=4), Cetacean (n=1), Raccoonpox (n=1),  
237 Skunkpox (n=1), Volepox (n=1), Cowpox (n=35), Variola (n=4), Tetrapox (n=1),  
238 Camelopox (n=9), Vaccinia (n=15), Horsepox (n=2), Rabbitpox (n=1), Buffalopox (n=6) and  
239 Monkeypox (n=71) viruses. The Monkeypox virus clustered distinctly from other  
240 members of the genus *Orthopoxvirus* but closely with the Vaccinia virus (Figure 1A). The  
241 Vaccinia virus clade comprised of other viruses namely Horsepox virus, Rabbitpox virus  
242 and Buffalopox virus.

243 There were similar clustering patterns in the monkeypox virus Clade I in the whole  
244 genome-based SNP tree, ANI-based dendrogram (Figure 1B) and core genome tree (Figure  
245 2A) except isolate W-Nigeria (KJ642615.1), which clustered with clade II members in  
246 whole genome SNP tree, suggesting at the genome level this isolate could have  
247 accumulated more variations. Most of the isolates in clade I originated from Nigeria.  
248 Interestingly, two isolates that had been reported from Singapore (MT9033421) and Israel  
249 (MN648051.1), also clustered with the Nigerian isolates, suggesting the high level of  
250 genomic similarity between these two isolates and the Nigerian isolates. A striking finding  
251 was the clustering of all the newly reported isolates together from 2022 with those in clade  
252 I (Figure 1A) in close proximity with strain Israel 2018 (MN 648051.1), suggesting that they  
253 emerged from those in clade I. However, further reports will clarify the pattern of  
254 emergence of these isolates.



255 Clade II, on the other hand, shows the consensus tree topology across all three methods  
256 used for the delineation of these species. This clade, however, harbours monkeypox virus  
257 from a variety of hosts, such as wild monkeys (Ivory Coast 2012 (KJ136820)), rope squirrels  
258 (USA2003\_099\_Rope\_Squirrels (MT903348)), Gambian rats (USA2003\_099\_Gambian\_Rats  
259 (MT903346)), dormouse (USA2003\_099\_Dormouses (MT903347)), prairie dog  
260 (USA\_2003\_044 (DQ011153)). The latter four isolates were found in the United States.  
261 Interestingly, one of the strains USA\_2003\_039 (DQ011157) isolated from *Homo sapiens*  
262 clusters tightly with different host types, namely rope squirrels, Gambian rats, dormouse,  
263 and prairie dogs, implying a recent emergence in humans and the infection is acquired  
264 through contact with animals. Additionally, the isolates from the Netherlands (strain UTC  
265 (KJ642614)) and France (strain PCH (KJ642616)) clustered separately based on the whole  
266 genome SNP method, but clustered together in core genome (Figure 2A) and ANI-based  
267 phylogeny (Figure 1B), suggesting the accumulation of additional mutations in due  
268 course.

269 Further, the Clade III in whole genome SNP-based tree clustered monkeypox viruses  
270 originated from the Democratic Republic of Congo and the limited metadata suggests that  
271 the majority of these isolates are of human origin. But the consensus tree topology was  
272 observed only in the case of phylogenetic trees derived using whole-genome SNPs and  
273 core genomes, except for strain DRC-07-120 (JX878418) which formed a minor clade with  
274 strain Zaire-96-I-16 (DQ011155). In both WGS, SNP-based and core genome trees, Clade  
275 IV clustered the isolates from Zaire, Democratic Republic of Congo, and the Central  
276 African Republic, all of which were of human origin, indicating that the infection spread  
277 by traveling and human contact. Like Clade IV, Clade V clustered the strains from the  
278 Democratic Republic of Congo and the Central African Republic and showed consensus  
279 tree topology in WGS SNP-based and core genome trees.

280 Additionally, the most ancestral strain in the core genome phylogenetic tree was the  
281 Monkeypox virus strain DRC 07-0104 (JX878417), while the strain Nigeria-SE-1971  
282 (KJ642617) exhibited ancestry with Vaccinia virus.

283

284 **Functional and evolutionary dynamics of monkeypox virus**

285 First, we examined the genes which were differentially enriched in 71 isolates of  
286 monkeypox. A total of 39 genes showed differential abundance (Figure 2B). The fact that  
287 28 of these 39 genes code for hypothetical proteins and on an average 123 genes code for  
288 hypothetical proteins per genome indicates that experimental evidence is required to  
289 ascertain their role in the viral genome. Further, the genes which were differentially  
290 enriched include protein B9, virion membrane protein, protein B14, Golgi-antiapoptotic  
291 protein, Kelch repeat protein F3, complement control protein and Kelch repeat and BTB  
292 domain (Figure 2B). Multiple reports have suggested that poxviruses encode for  
293 kelch/BTB proteins (cell signaling and transduction group) and these domains aid in  
294 substrate recruitment to cullin-3-based ubiquitin ligases. These are a part of the survival  
295 strategies of the virus against the host's antiviral responses and immune evasion [31].  
296 Complement control proteins (CCP) are also conserved in most poxviruses and genomic  
297 comparisons of viral isolates from Congo and West Africa have revealed that increased  
298 virulence in some isolates is credited to these groups of proteins. CCP homologs have been  
299 identified in various orthopox viruses such as vaccinia, variola, ectromelia, and cowpox  
300 virus. They have shown to be capable of inhibiting the activity of the complement system  
301 via binding of proteins and speeding up the decay of the various convertase enzymes in  
302 both classical and alternative pathways [32]. Golgi anti-apoptotic proteins (GAAP), first  
303 discovered in the camelpox virus are hydrophobic proteins of the Golgi membranes. Their  
304 function is to protect the cell from apoptotic stimuli and regulation of  $Ca^{2+}$  fluxes. It is  
305 postulated that GAAPs have a role in  $Ca^{2+}$  signaling and anti-apoptotic activities. They are  
306 a part of the transmembrane Bax inhibitor-containing motif (TMBIM) family that carries  
307 out similar functions [33]. As seen in Figure 2B, the maximum MPX under study has copies  
308 of GAAPs. Further, these proteins differ at a high sequence similarity level (>95%) and  
309 gene variants with low similarity may be present in these isolates, which would provide a  
310 novel avenue for further research on monkeypox viruses.

311 Second, we analysed the core genome of Monkeypox virus. A total of 140 genes were  
312 conserved among the monkeypox viruses (Figure 3A, Supplementary Table 2). Among the  
313 140 conserved genes, 34 code for hypothetical proteins. We then specifically used the core  
314 genome to quantifying selection pressure. The dN/dS metric is one of the most widely  
315 used methods of quantifying selection pressure which compares synonymous and non-

316 synonymous substitutions. This method is frequently used to determine whether the  
317 protein is subject to purifying selection ( $dN/dS < 1$ ), evolving neutrally ( $dN/dS \approx 1$ ), or  
318 undergoing positive, diversifying selection ( $dN/dS > 1$ )[34]. In the monkeypox core  
319 genome, we identified five proteins that were showing diversifying selection. These  
320 proteins include K3L, F1, CrmB, envelop protein and putative FAD-linked protein (Figure  
321 3B). The K3L protein shares 28% homology with eukaryotic translation initiation factor 2  
322 (eIF2 $\alpha$ ) which is a substrate for Protein Kinase R (PKR)[35]. As a component of the innate  
323 immune system in vertebrates, the PKR when interacts with K3L (pseudo-substrate  
324 inhibitor), magnifies the conundrum posed by viral mimicry. The PKR's effectiveness  
325 depends on its interaction with eIF2 $\alpha$  rather than it mimics such as K3L. K3L ( $dN/dS \approx$   
326 1.13) is still working towards achieving the optimal state of mimicry, which could help the  
327 virus to evade the innate immune response. The result agrees with the previous report by  
328 Elde *et al* (2009)[36], which also reported the unchanged nature of eIF2 $\alpha$  in simian primates  
329 and further suggested the evolution of K3L in response to the adaptive changes in PKR.  
330 Additionally, the mitochondrial-associated inhibitor of apoptosis i.e., protein F1 is  
331 positively selected and it has been reported to block apoptosis by binding to Bak in the  
332 vaccinia virus [37]. Further, it has been demonstrated that the deletion of the F1L gene  
333 from the vaccinia genome increased apoptosis during infection [37] and promotes  
334 virulence by inhibiting inflammasome activation [38], and its greater purifying selection  
335 ( $dN/dS \approx 1.61$ ) indicates that the gene is evolving in monkeypox virus during evolutionary  
336 processes in order to enhance its virulence. Likewise, the CrmB protein ( $dN/dS \approx 1.61$ ) is  
337 also under purifying selection, which may provide a selective advantage to the  
338 monkeypox virus to protect the infected cells from the host antiviral response. A cytokine  
339 secreted by T cells and macrophages, TNF- $\alpha$  protects cells from viral infection and can kill  
340 infected cells [39]. The CrmB protein binds to TNF- $\alpha$  and TNF- $\beta$  and thus protects the  
341 infected cells by preventing TNF-mediated immune response against viruses  
342 [39]. Furthermore, the two other positively selected proteins, i.e., the envelope protein and  
343 the putative FAD-linked protein, might be evolving to help the virus to overcome  
344 intracellular host restrictions and achieve efficient survival.

345 As mentioned above, MPXV genes were broadly divided into five broad categories for  
346 functional analysis (Figure 4, Supplementary Table 1). The maximum number of genes  
347 were characterised under the category virulence and infection ( $44.46 \pm 1.39$ ), followed by  
348 genetic information processing ( $41.80 \pm 0.87$ ), structural proteins ( $23.07 \pm 0.97$ ), cell  
349 signalling and transduction ( $20.30 \pm 1.29$ ) while the lowest were involved in metabolism  
350 ( $16.3 \pm 0.57$ ), emphasizing the dependency of viral genomes on host profiles for  
351 metabolism processing, while converging more on conferring virulence. There were  
352 differences in the number of genes under different categories at the isolate level, but no  
353 significant differences were observed at the clade level (Figure 4). Interestingly, the  
354 mutation analysis in clade I revealed 59 proteins with amino acid level mutations  
355 (Supplementary Table 3), suggesting the proteins are constantly adapting to their broad  
356 host range.

### 357 **Exploring the network for host-pathogen interaction between monkeypox virus and its** 358 **host**

359 A detailed study of the interplay between poxvirus proteins and the host immune system  
360 is of great interest to understand the infectivity of these viruses and will also pave the way  
361 to successfully design and administer recombinant vaccines. The HPI network of  
362 Monkeypox-virus contained 331 edges and 273 nodes, including 55 viral and 218 host  
363 proteins (Figure 5A). The significant existence of a few hubs, namely, protein E3 and serine  
364 protease inhibitor-2 (SPI-2), protein K7, and CrmB in the network and the attraction of a  
365 large number of low-degree nodes toward each hub showed strong evidence of control of  
366 the topological properties of the network by a few hub proteins. Protein E3 was found to  
367 have a connection with 47 human host proteins whereas SPI-2, protein K7, and CrmB  
368 exhibited 37, 33, and 21 degrees, respectively (Figure 5A). These monkeypox viral proteins  
369 were the main hubs in the network, which regulate/control the network. Based on degree  
370 distribution, the viral protein E3 showed the highest interaction, followed by Serine  
371 protease inhibitor 2, protein K7, and CrmB.

372 Protein E3 plays a critical role in unhindered viral replication by blocking the cellular  
373 innate immune system [40]. Generation of interferons (IFN) is the prime response against  
374 viral infection. E3 protein of monkeypox virus is known to produce IFN resistant  
375 phenotypes by inhibiting the phosphorylation of PKR and eIF2 $\alpha$  [41] which is in  
376 accordance with our interactome study where E3 is interacting with host EIF2AK2.  
377 Further, the interactome analysis also showed that E3 protein interacts with host

378 interleukin enhancing binding factors 2 and 3 (ILF2/3) which are known for providing an  
379 innate antiviral response by regulating the transcription of IL2 gene during T cell  
380 activation [42]. Furthermore, it is known that the suppression of cognate T cell activation  
381 which evades CD8<sup>+</sup> and CD4<sup>+</sup> responses is one of the immune escape mechanisms of  
382 monkeypox virus [43].

383 Our study has shown that viral protein K7 is interacting with several host proteins like  
384 NCOR1, SPIRE1, DDX3X, WNK1/2/3, SNX5, etc. K7 is known as an antagonist of innate  
385 immunity and acts as a virulence factor that inhibits IRF3 and NFκB activation [44].  
386 Studies on the vaccinia virus have also shown that K7 protein interacts with SPIR-1 which  
387 is a virus restriction factor and activates innate immune signaling which is critical for the  
388 host response against viral infection [45]. In addition to it, our interactome analysis showed  
389 the interaction between K7 and DEAD-box protein 3 (DDX3). In the viral infection, the  
390 viruses are detected by several pattern recognition receptors (PRR) like TLRs, RIG like  
391 helicases, etc., which promotes antiviral activity by inducing IFN- $\alpha$  production through  
392 the activation of interferon (IFN)-regulatory factor 3 (IRF3) and IRF7. Studies on vaccinia  
393 virus (VACV) have shown that interaction between K7 protein with DDX3 inhibits PRR-  
394 induced IFN- $\beta$  induction by suppressing TBK1/IKK $\epsilon$ -mediated IRF activation [46].

395 K7 of vaccinia virus also interacts with WNK (with-no-lysine) family which plays a crucial  
396 role in antiviral immune response and knockdown of WNK family members resulting in  
397 increased growth of vaccinia virus in the host. WNK 1 and WNK 3 stimulate interleukin  
398 1(IL-1) by activating p38 kinase which is inhibited by co-expression of K7 [47].  
399 Interestingly, our interactome study between human and monkeypox virus also showed  
400 an interaction between K7 and WNK family members. The PPI interactions also showed  
401 that two host proteins, NCOR1 and NCOR2, exhibit a maximum interaction with viral  
402 proteins. NCOR1 interacting with viral hub protein K7 showed an important co-relation  
403 with infections caused by the monkeypox virus. Both NCOR1 and NCOR2 are responsible  
404 for the repression of transcription by promoting histone deacetylation and chromatin  
405 repression and impeding access to transcription factors [48] and hence can be proposed to  
406 bring about gene silencing during infection by the viruses in the host.

407

408 In the activation of antiviral immune response by the host, TNF plays a pivotal role, where  
409 it either acts directly as cell death-inducing cytokine on virus-infected cells or indirectly as  
410 an inducer of the innate and adaptive immune response against the invading virus.  
411 Viruses have co-evolved with the host for their better survival and devised several  
412 strategies to evade TNF-mediated responses. One such strategy is the generation of  
413 Cytokine response modifying protein B (CrmB) which is an excellent immunomodulator.  
414 Studies have shown that CrmB binds with TNF and several chemokines like CCL25,  
415 CCL28, CXCL12 $\beta$ , CXCL13 and CXCL14 to inhibit host immune responses against the  
416 virus [48, 49]. The binding of CrmB with chemokines prevents recruitment of T cells and  
417 B cells, dendritic cell migration to epidermal tissue and recruitment of B cells to spleen and  
418 lymph nodes [50]. Interestingly, our PPI results also showed the interaction of CrmB  
419 protein of monkeypox virus with host TNF and several chemokines like CCL1, CCL21,  
420 CCL25, CXCL13, CXCL14, etc. Another key protein hub, SPI-2 also contributes to poxvirus  
421 immune escape. By targeting caspase-1, SPI-2 prevents apoptosis and cytokine activation.  
422 Further, the induction of IFN- $\beta$  and its downstream genes is inhibited by the ectopic  
423 expression of SPI-2, thus preventing the host to confer INF mediated immune response  
424 against viruses.

425

### 426 **Structural analysis of CrmB protein**

427 Computational structural analysis has been carried out to understand the effect of  
428 mutation on the key CrmB viral proteins. Based on the host-pathogen analysis, a few key  
429 proteins like protein E3, SPI-2, protein E8, and CrmB seemed to generate interest. Among  
430 these key proteins, the structural analysis of CrmB was performed, as this gene was  
431 showing positive selection in dN/dS analysis. In the case of CrmB, a structurally similar  
432 template was not identified for the major part of the protein. So, modeling was carried out  
433 using Phyre2 tool to obtain a 3D structure of the CrmB protein (Figure 6). The hydrogen  
434 bond analysis using the pymol showed that due to the insertion of valine and S54F  
435 mutation there is a loss of some hydrogen bond which could disturb the structure (Figure  
436 6A). The stability ( $\Delta G$ ) of a protein is defined by the free energy, which is expressed in  
437 kcal/mol. The lower the value of  $\Delta G$ , the more stability. Here we calculated the  $\Delta\Delta G$   
438 which is the difference in free energy between wild-type and mutant. The mutation that

439 brings energy ( $\Delta\Delta G$ ) higher than 0 will destabilize the structure and lower than 0 will  
440 stabilize the structure. In the case of CrmB protein, the four mutations were S121A, S54F,  
441 R224V and an insertion of valine (V) at position 172. Among all the four mutations, three  
442 of them S121A, S54F and insertion of V at 172 were destabilizing the structure, whereas  
443 R224V was found to stabilize the protein (Figure 6B).

444 CrmB protein has a Smallpox virus-encoded chemokine receptor (SECRET) domain that  
445 dispenses chemokine inhibitory activities and that allows the virus to differentially block  
446 chemokines and TNFs [50]. CrmB host protein interacts with the host TNFs via its N-  
447 terminal domain [51]. It also interacts with Calcium Modulating Ligand (CAMLG) which  
448 takes part in the calcium signal transduction pathway [50]. Further, it interacts with Mucin  
449 5B protein, a glycosylated macromolecular component of mucus secretions. The protein  
450 K7, a part of the virulence and infection proteins interacts with the DEAD-box RNA  
451 helicase DDX3, tumour necrosis factor-associated factor 6 and interleukin-1 receptor  
452 associated kinase to inhibit activity of interferon regulatory factors [44].

453

## 454 **Conclusion**

455 With the sudden increase in the number of cases of human monkeypox all over the world,  
456 it is necessary that we rapidly unfold the mutational rate, virulence and evolutionary  
457 lineage of different isolates from across different geographical locations of the world from  
458 where cases have been reported. Although we have only analyzed 71 genomes but one of  
459 the major outcomes of this study was the fact that the four strains associated with the  
460 recent outbreak were not just clustered in Clade I which was predominantly occupied by  
461 Nigerian isolates. On the contrary these strains exhibited maximum similarity with an  
462 Israeli isolate. Another interesting outcome sprouted from the Host-Pathogen  
463 interactome analysis, common CrmB protein presumptively appeared to be a key  
464 regulator in conferring monkeypox virus with a selective advantage against the host  
465 immune system. The presence of S54F mutation in CrmB protein which was common of  
466 all the recently documented isolates of monkeypox, reflected that the selected strains are  
467 possibly adapting. The current outbreak may end up bringing another pandemic, this it  
468 is imperative that emphasis should be shifted to sequencing more genomes of monkeypox

469 virus from across different geographical locations to devise better treatment and  
470 prevention strategies and to prevent another major outbreak.

#### 471 **ACKNOWLEDGMENTS**

472 RK acknowledges Magadh University, Bodh Gaya, for providing support. RL and US also  
473 acknowledge The National Academy of Sciences, India, for support under the NASI-  
474 Senior Scientist Platinum Jubilee Fellowship Scheme.

475

#### 476 **Conflict of Interest Statement**

477 We declare that we have no conflict of interest.

478

#### 479 **Author contribution statement**

480 RK, IKS and RL conceived and designed the study. RK, SN, SH, US, KP, GGD, SA, AD,  
481 MS executed the analysis and prepared figures. RK, SN, SH, US, KP, GGD, SA, AD, MS,  
482 MS, IKS and RL wrote the manuscript and finalized the drafts.

483

484

485

486

487

488

#### 489 **REFERENCES:**

490

- 491 1. Ladnyj ID, Ziegler P, Kima E: **A human infection caused by monkeypox virus in**  
492 **Basankusu Territory, Democratic Republic of the Congo.** *Bull World Health Organ*  
493 1972, **46**(5):593-597.
- 494 2. Sklenovska N, Van Ranst M: **Emergence of Monkeypox as the Most Important**  
495 **Orthopoxvirus Infection in Humans.** *Front Public Health* 2018, **6**:241.
- 496 3. Adler H, Gould S, Hine P, Snell LB, Wong W, Houlihan CF, Osborne JC, Rampling  
497 T, Beadsworth MB, Duncan CJ *et al*: **Clinical features and management of human**  
498 **monkeypox: a retrospective observational study in the UK.** *Lancet Infect Dis* 2022.
- 499 4. Vaughan A, Aarons E, Astbury J, Brooks T, Chand M, Flegg P, Hardman A, Harper  
500 N, Jarvis R, Mawdsley S *et al*: **Human-to-Human Transmission of Monkeypox**  
501 **Virus, United Kingdom, October 2018.** *Emerg Infect Dis* 2020, **26**(4):782-785.
- 502 5. Reynolds MG, Yorita KL, Kuehnert MJ, Davidson WB, Huhn GD, Holman RC,  
503 Damon IK: **Clinical manifestations of human monkeypox influenced by route of**  
504 **infection.** *J Infect Dis* 2006, **194**(6):773-780.
- 505 6. Kumar R, Verma H, Singhvi N, Sood U, Gupta V, Singh M, Kumari R, Hira P, Nagar  
506 S, Talwar C *et al*: **Comparative Genomic Analysis of Rapidly Evolving SARS-**  
507 **CoV-2 Reveals Mosaic Pattern of Phylogeographical Distribution.** *mSystems* 2020,  
508 **5**(4).



- 509 7. Gupta V, Haider S, Verma M, Singhvi N, Ponnusamy K, Malik MZ, Verma H,  
510 Kumar R, Sood U, Hira P *et al*: **Comparative Genomics and Integrated Network**  
511 **Approach Unveiled Undirected Phylogeny Patterns, Co-mutational Hot Spots,**  
512 **Functional Cross Talk, and Regulatory Interactions in SARS-CoV-2.** *mSystems*  
513 2021, **6**(1).
- 514 8. Gurevich A, Saveliev V, Vyahhi N, Tesler G: **QUAST: quality assessment tool for**  
515 **genome assemblies.** *Bioinformatics* 2013, **29**(8):1072-1075.
- 516 9. Seemann T: **Prokka: rapid prokaryotic genome annotation.** *Bioinformatics* 2014,  
517 **30**(14):2068-2069.
- 518 10. Gardner SN, Slezak T, Hall BG: **kSNP3.0: SNP detection and phylogenetic analysis**  
519 **of genomes without genome alignment or reference genome.** *Bioinformatics* 2015,  
520 **31**(17):2877-2878.
- 521 11. Letunic I, Bork P: **Interactive Tree Of Life (iTOL) v5: an online tool for**  
522 **phylogenetic tree display and annotation.** *Nucleic Acids Res* 2021, **49**(W1):W293-  
523 W296.
- 524 12. Pritchard L, Glover RH, Humphris S, Elphinstone JG, Toth IK: **Genomics and**  
525 **taxonomy in diagnostics for food security: soft-rotting enterobacterial plant**  
526 **pathogens.** *Analytical Methods* 2016, **8**(1):12-24.
- 527 13. Loytynoja A: **Phylogeny-aware alignment with PRANK.** *Methods Mol Biol* 2014,  
528 **1079**:155-170.
- 529 14. Page AJ, Cummins CA, Hunt M, Wong VK, Reuter S, Holden MT, Fookes M, Falush  
530 D, Keane JA, Parkhill J: **Roary: rapid large-scale prokaryote pan genome analysis.**  
531 *Bioinformatics* 2015, **31**(22):3691-3693.
- 532 15. Tamura K, Stecher G, Kumar S: **MEGA11: Molecular Evolutionary Genetics**  
533 **Analysis Version 11.** *Molecular Biology and Evolution* 2021, **38**(7):3022-3027.
- 534 16. Contreras-Moreira B, Vinuesa P: **GET\_HOMOLOGUES, a versatile software**  
535 **package for scalable and robust microbial pangenome analysis.** *Appl Environ*  
536 *Microbiol* 2013, **79**(24):7696-7701.
- 537 17. Pond SL, Frost SD, Muse SV: **HyPhy: hypothesis testing using phylogenies.**  
538 *Bioinformatics* 2005, **21**(5):676-679.
- 539 18. Weaver S, Shank SD, Spielman SJ, Li M, Muse SV, Kosakovsky Pond SL:  
540 **Datamonkey 2.0: A Modern Web Application for Characterizing Selective and**  
541 **Other Evolutionary Processes.** *Mol Biol Evol* 2018, **35**(3):773-777.
- 542 19. Gabrielaite M, Marvig RL: **GenAPI: a tool for gene absence-presence**  
543 **identification in fragmented bacterial genome sequences.** *BMC Bioinformatics*  
544 2020, **21**(1):320.
- 545 20. Li W, Godzik A: **Cd-hit: a fast program for clustering and comparing large sets of**  
546 **protein or nucleotide sequences.** *Bioinformatics* 2006, **22**(13):1658-1659.
- 547 21. Ammari MG, Gresham CR, McCarthy FM, Nanduri B: **HPIDB 2.0: a curated**  
548 **database for host-pathogen interactions.** *Database (Oxford)* 2016, **2016**.
- 549 22. Altschul SF, Gish W, Miller W, Myers EW, Lipman DJ: **Basic local alignment search**  
550 **tool.** *J Mol Biol* 1990, **215**(3):403-410.
- 551 23. Shannon P, Markiel A, Ozier O, Baliga NS, Wang JT, Ramage D, Amin N,  
552 Schwikowski B, Ideker T: **Cytoscape: a software environment for integrated**  
553 **models of biomolecular interaction networks.** *Genome Res* 2003, **13**(11):2498-2504.

- 554 24. Assenov Y, Ramirez F, Schelhorn SE, Lengauer T, Albrecht M: **Computing**  
555 **topological parameters of biological networks.** *Bioinformatics* 2008, **24**(2):282-284.
- 556 25. Kelley LA, Mezulis S, Yates CM, Wass MN, Sternberg MJE: **The Phyre2 web portal**  
557 **for protein modeling, prediction and analysis.** *Nat Protoc* 2015, **10**(6):845-858.
- 558 26. Waterhouse A, Bertoni M, Bienert S, Studer G, Tauriello G, Gumienny R, Heer FT,  
559 de Beer TA P, Rempfer C, Bordoli L *et al*: **SWISS-MODEL: homology modelling**  
560 **of protein structures and complexes.** *Nucleic Acids Research* 2018, **46**(W1):W296-  
561 W303.
- 562 27. Ramachandran S, Kota P, Ding F, Dokholyan NV: **Automated minimization of**  
563 **steric clashes in protein structures.** *Proteins* 2011, **79**(1):261-270.
- 564 28. Buß O, Rudat J, Ochsenreither K: **FoldX as Protein Engineering Tool: Better Than**  
565 **Random Based Approaches?** *Computational and Structural Biotechnology Journal*  
566 2018, **16**:25-33.
- 567 29. Kugelman JR, Johnston SC, Mulembakani PM, Kisalu N, Lee MS, Koroleva G,  
568 McCarthy SE, Gestole MC, Wolfe ND, Fair JN *et al*: **Genomic variability of**  
569 **monkeypox virus among humans, Democratic Republic of the Congo.** *Emerg*  
570 *Infect Dis* 2014, **20**(2):232-239.
- 571 30. Ligon BL: **Monkeypox: a review of the history and emergence in the Western**  
572 **hemisphere.** *Semin Pediatr Infect Dis* 2004, **15**(4):280-287.
- 573 31. Wilton BA, Campbell S, Van Buuren N, Garneau R, Furukawa M, Xiong Y, Barry  
574 M: **Ectromelia virus BTB/kelch proteins, EVM150 and EVM167, interact with**  
575 **cullin-3-based ubiquitin ligases.** *Virology* 2008, **374**(1):82-99.
- 576 32. Hudson PN, Self J, Weiss S, Braden Z, Xiao Y, Girgis NM, Emerson G, Hughes C,  
577 Sammons SA, Isaacs SN *et al*: **Elucidating the role of the complement control**  
578 **protein in monkeypox pathogenicity.** *PLoS One* 2012, **7**(4):e35086.
- 579 33. Saraiva N, Prole DL, Carrara G, Maluquer de Motes C, Johnson BF, Byrne B, Taylor  
580 CW, Smith GL: **Human and viral Golgi anti-apoptotic proteins (GAAPs)**  
581 **oligomerize via different mechanisms and monomeric GAAP inhibits apoptosis**  
582 **and modulates calcium.** *J Biol Chem* 2013, **288**(18):13057-13067.
- 583 34. Verma H, Kumar R, Oldach P, Sangwan N, Khurana JP, Gilbert JA, Lal R:  
584 **Comparative genomic analysis of nine Sphingobium strains: insights into their**  
585 **evolution and hexachlorocyclohexane (HCH) degradation pathways.** *BMC*  
586 *Genomics* 2014, **15**:1014.
- 587 35. Kawagishi-Kobayashi M, Silverman JB, Ung TL, Dever TE: **Regulation of the**  
588 **protein kinase PKR by the vaccinia virus pseudosubstrate inhibitor K3L is**  
589 **dependent on residues conserved between the K3L protein and the PKR**  
590 **substrate eIF2alpha.** *Mol Cell Biol* 1997, **17**(7):4146-4158.
- 591 36. Elde NC, Child SJ, Geballe AP, Malik HS: **Protein kinase R reveals an evolutionary**  
592 **model for defeating viral mimicry.** *Nature* 2009, **457**(7228):485-489.
- 593 37. Postigo A, Cross JR, Downward J, Way M: **Interaction of F1L with the BH3 domain**  
594 **of Bak is responsible for inhibiting vaccinia-induced apoptosis.** *Cell Death Differ*  
595 2006, **13**(10):1651-1662.
- 596 38. Gerlic M, Faustin B, Postigo A, Yu EC, Proell M, Gombosuren N, Krajewska M,  
597 Flynn R, Croft M, Way M *et al*: **Vaccinia virus F1L protein promotes virulence by**  
598 **inhibiting inflammasome activation.** *Proc Natl Acad Sci U S A* 2013, **110**(19):7808-  
599 7813.

- 600 39. Weaver JR, Isaacs SN: **Monkeypox virus and insights into its immunomodulatory**  
601 **proteins.** *Immunol Rev* 2008, **225**:96-113.
- 602 40. White SD, Jacobs BL: **The amino terminus of the vaccinia virus E3 protein is**  
603 **necessary to inhibit the interferon response.** *J Virol* 2012, **86**(10):5895-5904.
- 604 41. Arndt WD, Cotsmire S, Trainor K, Harrington H, Hauns K, Kibler KV, Huynh TP,  
605 Jacobs BL: **Evasion of the Innate Immune Type I Interferon System by**  
606 **Monkeypox Virus.** *J Virol* 2015, **89**(20):10489-10499.
- 607 42. Stricker RL, Behrens SE, Mundt E: **Nuclear factor NF45 interacts with viral**  
608 **proteins of infectious bursal disease virus and inhibits viral replication.** *J Virol*  
609 2010, **84**(20):10592-10605.
- 610 43. Hammarlund E, Dasgupta A, Pinilla C, Norori P, Fruh K, Slifka MK: **Monkeypox**  
611 **virus evades antiviral CD4+ and CD8+ T cell responses by suppressing cognate**  
612 **T cell activation.** *Proc Natl Acad Sci U S A* 2008, **105**(38):14567-14572.
- 613 44. Benfield CTO, Ren H, Lucas SJ, Bahsoun B, Smith GL: **Vaccinia virus protein K7 is**  
614 **a virulence factor that alters the acute immune response to infection.** *J Gen Virol*  
615 2013, **94**(Pt 7):1647-1657.
- 616 45. Torres AA, Macilwee SL, Rashid A, Cox SE, Albarnaz JD, Bonjardim CA, Smith GL:  
617 **The actin nucleator Spir-1 is a virus restriction factor that promotes innate**  
618 **immune signalling.** *PLoS Pathog* 2022, **18**(2):e1010277.
- 619 46. Schroder M, Baran M, Bowie AG: **Viral targeting of DEAD box protein 3 reveals**  
620 **its role in TBK1/IKKepsilon-mediated IRF activation.** *EMBO J* 2008, **27**(15):2147-  
621 2157.
- 622 47. Pichlmair A, Kandasamy K, Alvisi G, Mulhern O, Sacco R, Habjan M, Binder M,  
623 Stefanovic A, Eberle CA, Goncalves A *et al*: **Viral immune modulators perturb the**  
624 **human molecular network by common and unique strategies.** *Nature* 2012,  
625 **487**(7408):486-490.
- 626 48. Zhou W, He Y, Rehman AU, Kong Y, Hong S, Ding G, Yalamanchili HK, Wan Y-  
627 W, Paul B, Wang C *et al*: **Loss of function of NCOR1 and NCOR2 impairs memory**  
628 **through a novel GABAergic hypothalamus-CA3 projection.** *Nature Neuroscience*  
629 2019, **22**(2):205-217.
- 630 49. Gileva IP, Nepomnyashchikh TS, Antonets DV, Lebedev LR, Kochneva GV,  
631 Grazhdantseva AV, Shchelkunov SN: **Properties of the recombinant TNF-binding**  
632 **proteins from variola, monkeypox, and cowpox viruses are different.** *Biochim*  
633 *Biophys Acta* 2006, **1764**(11):1710-1718.
- 634 50. Alejo A, Ruiz-Arguello MB, Ho Y, Smith VP, Saraiva M, Alcami A: **A chemokine-**  
635 **binding domain in the tumor necrosis factor receptor from variola (smallpox)**  
636 **virus.** *Proc Natl Acad Sci U S A* 2006, **103**(15):5995-6000.
- 637 51. Antonets DV, Nepomnyashchikh TS, Shchelkunov SN: **SECRET domain of variola**  
638 **virus CrmB protein can be a member of poxviral type II chemokine-binding**  
639 **proteins family.** *BMC Res Notes* 2010, **3**:271.
- 640
- 641

642 **Figure 1:** The Phylogenetic analysis of monkeypox virus A. The whole genome SNP based phylogenetic tree  
643 of members of Orthopox virus was constructed using kSNP3 and visualized in iTOL. B. The average  
644 nucleotide identity matrix representing the sequence similarity of 71 monkeypox viruses. The distance

645 matrix was converted into Neighbour Joining tree using the Ape package in R. Subsequently, the graph of  
646 correlation matrix was plotted using the corrplot function in R.

647

648 **Figure 2:** A. The phylogenetic tree constructed using the core genome (n=140). The multifasta core genome  
649 alignment was generated using PRANK in Roary with minimum percentage identity of 95%. The alignment  
650 file was used to construct the phylogenetic tree using Maximum Likelihood statistical method and Jukes-  
651 Cantor model in Mega XI.

652

653 **Figure 3:** A. The mapping of core gene distribution across the reference genome of Monkeypox virus strain  
654 015. B. The dN/dS analysis of core genes for estimating the direction of selection.

655

656 **Figure 4:** The distribution of monkeypox proteins in different phylogenetic groups under six broad  
657 categories namely Genetic information processing, Cell signalling & transduction, Metabolism, Virulence  
658 and infection and Structural proteins.

659

660 **Figure 5: The host-pathogen interaction network.** Monkeypox-virus protein sequences were submitted to  
661 HPIDB3.0, the host-pathogen interaction database, to predict their direct interaction with humans as the  
662 principal host. Cytoscape v3.9.1 was used to construct and visualize the HPI network. The hub proteins were  
663 identified using Network Analyzer, a plugin of Cytoscape v3.9.1.

664

665 **Figure 6: The structure analysis of crmB protein.** A) Structures depicting the mutations i.e., S121A, S54F,  
666 R224V and an insertion of valine (V) at position 172; B) The  $\Delta\Delta G$  analysis to depict the stability of mutations.  
667 Mutations that bring energy ( $\Delta\Delta G$ ) higher than 0 will destabilize the structure and mutations that bring  
668 energy ( $\Delta\Delta G$ ) lower than 0 will stabilize it.

669

670

671

**Table 1: The general genomic attributes of monkey pox viruses**

| <b>S. No.</b> | <b>Isolate</b>              | <b>Accession Number</b> | <b>Genome Size (bp)</b> | <b>CDS</b> | <b>GC%</b> | <b>Host</b>  | <b>Country</b>           | <b>Collection Date</b> | <b>Date of Sequence Submission</b> | <b>Publication</b> |
|---------------|-----------------------------|-------------------------|-------------------------|------------|------------|--------------|--------------------------|------------------------|------------------------------------|--------------------|
| 1.            | Monkeypox virus strain 015c | MN702448                | 189838                  | 177        | 32.9       | Homo sapiens | Central African Republic | 07-Mar-18              | 29-Aug-20                          | Unpublished        |
| 2.            | Monkeypox virus strain 18   | MN702447                | 189841                  | 179        | 33         | Homo sapiens | Central African Republic | 20-Mar-18              | 29-Aug-20                          | Unpublished        |
| 3.            | Monkeypox virus strain 38c  | MN702446                | 190357                  | 195        | 33         | Homo sapiens | Central African Republic | 14-Apr-18              | 29-Aug-20                          | Unpublished        |
| 4.            | Monkeypox virus strain A1   | MN702453                | 189632                  | 182        | 33         | Homo sapiens | Central African Republic | 11-Aug-01              | 29-Aug-20                          | Unpublished        |
| 5.            | Monkeypox virus strain A2   | MN702452                | 190244                  | 183        | 33         | Homo sapiens | Central African Republic | 10-Aug-10              | 29-Aug-20                          | Unpublished        |
| 6.            | Monkeypox virus strain A4   | MN702445                | 190519                  | 170        | 33         | Homo sapiens | Central African Republic | 06-Feb-17              | 29-Aug-20                          | Unpublished        |
| 7.            | Monkeypox virus strain A5   | MN702444                | 190167                  | 170        | 33         | Homo sapiens | Central African Republic | 06-Feb-17              | 29-Aug-20                          | Unpublished        |
| 8.            | Monkeypox virus strain A6   | MN702451                | 190413                  | 191        | 33         | Homo sapiens | Central African Republic | 14-Apr-17              | 29-Aug-20                          | Unpublished        |
| 9.            | Monkeypox virus strain B1   | MN702450                | 190264                  | 191        | 33         | Homo sapiens | Central African Republic | 01-Jan-16              | 29-Aug-20                          | Unpublished        |

|     |                                           |          |        |     |      |              |                                         |            |           |                                              |
|-----|-------------------------------------------|----------|--------|-----|------|--------------|-----------------------------------------|------------|-----------|----------------------------------------------|
| 10. | Monkeypox virus strain B2                 | MN702449 | 190270 | 190 | 33   | Homo sapiens | Central African Republic                | 02-01-2016 | 29-Aug-20 | Unpublished                                  |
| 11. | Monkeypox virus strain Boende_DRC_2008    | KP849469 | 197422 | 188 | 33.1 | NA           | Democratic Republic of the Congo        | 2008       | 13-May-15 | Viruses 7 (4), 2168-2184 (2015)              |
| 12. | Monkeypox virus strain Cameroon-1990      | KJ642618 | 194363 | 177 | 33.1 | NA           | Republic of Cameroon                    | 1990       | 11-May-15 | Viruses 7 (4), 2168-2184 (2015)              |
| 13. | Monkeypox virus strain Congo_2003_358     | DQ011154 | 197195 | 200 | 33.1 | Homo sapiens | NA                                      | NA         | 28-Sep-05 | J. Gen. Virol. 86 (PT 10), 2661-2672 (2005)  |
| 14. | Monkeypox virus strain Congo_2003_358     | KJ642613 | 197195 | 178 | 33.1 | Homo sapiens | Zaire, Democratic Republic of the Congo | 1970       | 28-Sep-05 | Viruses 7 (4), 2168-2184 (2015)              |
| 15. | Monkeypox virus strain COP-58             | AY753185 | 199469 | 177 | 33.1 | NA           | NA                                      | NA         | 07-Sep-05 | Virology 340 (1), 46-63 (2005)               |
| 16. | Monkeypox virus strain Cote d'Ivoire_1971 | KP849470 | 200397 | 185 | 33.1 | NA           | NA                                      | 1971       | 13-May-15 | Viruses 7 (4), 2168-2184 (2015)              |
| 17. | Monkeypox virus strain DRC 06-0950        | JX878407 | 196440 | 190 | 33.1 | Homo sapiens | Democratic Republic of the Congo        | 09-10-2006 | 14-Jan-14 | Emerging Infect. Dis. 20 (2), 232-239 (2014) |
| 18. | Monkeypox virus strain DRC 06-0970        | JX878408 | 196740 | 191 | 33.1 | Homo sapiens | Democratic Republic of the Congo        | 31-10-2006 | 14-Jan-14 | Emerging Infect. Dis. 20 (2), 232-239 (2014) |
| 19. | Monkeypox virus strain DRC 06-0999        | JX878409 | 198597 | 191 | 33.1 | Homo sapiens | Democratic Republic of the Congo        | 09-11-2006 | 14-Jan-14 | Emerging Infect. Dis. 20 (2), 232-239 (2014) |
| 20. | Monkeypox virus strain DRC 06-1070        | JX878410 | 198886 | 191 | 33.1 | Homo sapiens | Democratic Republic of the Congo        | 24-11-2006 | 14-Jan-14 | Emerging Infect. Dis. 20 (2), 232-239 (2014) |

|     |                                    |          |        |     |      |              |                                  |            |           |                                              |
|-----|------------------------------------|----------|--------|-----|------|--------------|----------------------------------|------------|-----------|----------------------------------------------|
| 21. | Monkeypox virus strain DRC 06-1075 | JX878411 | 198877 | 191 | 33.1 | Homo sapiens | Democratic Republic of the Congo | 30-11-2006 | 14-Jan-14 | Emerging Infect. Dis. 20 (2), 232-239 (2014) |
| 22. | Monkeypox virus strain DRC 06-1076 | JX878412 | 198737 | 191 | 33.1 | Homo sapiens | Democratic Republic of the Congo | 30-11-2006 | 14-Jan-14 | Emerging Infect. Dis. 20 (2), 232-239 (2014) |
| 23. | Monkeypox virus strain DRC 07-0045 | JX878413 | 197627 | 191 | 33.1 | Homo sapiens | Democratic Republic of the Congo | 14-12-2006 | 14-Jan-14 | Emerging Infect. Dis. 20 (2), 232-239 (2014) |
| 24. | Monkeypox virus strain DRC 07-0046 | JX878414 | 197910 | 191 | 33.1 | Homo sapiens | Democratic Republic of the Congo | 14-12-2006 | 14-Jan-14 | Emerging Infect. Dis. 20 (2), 232-239 (2014) |
| 25. | Monkeypox virus strain DRC 07-0092 | JX878415 | 197488 | 191 | 33.1 | Homo sapiens | Democratic Republic of the Congo | 26-12-2006 | 14-Jan-14 | Emerging Infect. Dis. 20 (2), 232-239 (2014) |
| 26. | Monkeypox virus strain DRC 07-0093 | JX878416 | 197632 | 191 | 33.1 | Homo sapiens | Democratic Republic of the Congo | 26-12-2006 | 14-Jan-14 | Emerging Infect. Dis. 20 (2), 232-239 (2014) |
| 27. | Monkeypox virus strain DRC 07-0104 | JX878417 | 197959 | 191 | 33.1 | Homo sapiens | Democratic Republic of the Congo | 14-12-2006 | 14-Jan-14 | Emerging Infect. Dis. 20 (2), 232-239 (2014) |
| 28. | Monkeypox virus strain DRC 07-0120 | JX878418 | 196740 | 191 | 33.1 | Homo sapiens | Democratic Republic of the Congo | 02-01-2007 | 14-Jan-14 | Emerging Infect. Dis. 20 (2), 232-239 (2014) |
| 29. | Monkeypox virus strain DRC 07-0275 | JX878419 | 196732 | 191 | 33.1 | Homo sapiens | Democratic Republic of the Congo | 10-02-2007 | 14-Jan-14 | Emerging Infect. Dis. 20 (2), 232-239 (2014) |
| 30. | Monkeypox virus strain DRC 07-0283 | JX878420 | 196730 | 191 | 33.1 | Homo sapiens | Democratic Republic of the Congo | 26-02-2007 | 14-Jan-14 | Emerging Infect. Dis. 20 (2), 232-239 (2014) |

|     |                                          |          |        |     |      |              |                                            |            |           |                                              |
|-----|------------------------------------------|----------|--------|-----|------|--------------|--------------------------------------------|------------|-----------|----------------------------------------------|
| 31. | Monkeypox virus strain DRC 07-0286       | JX878421 | 197767 | 191 | 33.1 | Homo sapiens | Democratic Republic of the Congo           | 22-03-2007 | 14-Jan-14 | Emerging Infect. Dis. 20 (2), 232-239 (2014) |
| 32. | Monkeypox virus strain DRC 07-0287       | JX878422 | 197346 | 191 | 33.1 | Homo sapiens | Democratic Republic of the Congo           | 20-03-2007 | 14-Jan-14 | Emerging Infect. Dis. 20 (2), 232-239 (2014) |
| 33. | Monkeypox virus strain DRC 07-0337       | JX878423 | 196581 | 190 | 33.1 | Homo sapiens | Democratic Republic of the Congo           | 25-03-2007 | 14-Jan-14 | Emerging Infect. Dis. 20 (2), 232-239 (2014) |
| 34. | Monkeypox virus strain DRC 07-0338       | JX878424 | 196376 | 190 | 33.1 | Homo sapiens | Democratic Republic of the Congo           | 25-03-2007 | 14-Jan-14 | Emerging Infect. Dis. 20 (2), 232-239 (2014) |
| 35. | Monkeypox virus strain DRC 07-0354       | JX878425 | 197147 | 190 | 33.1 | Homo sapiens | Democratic Republic of the Congo           | 20-04-2007 | 14-Jan-14 | Emerging Infect. Dis. 20 (2), 232-239 (2014) |
| 36. | Monkeypox virus strain DRC 07-0450       | JX878426 | 196747 | 191 | 33.1 | Homo sapiens | Democratic Republic of the Congo           | 27-05-2007 | 14-Jan-14 | Emerging Infect. Dis. 20 (2), 232-239 (2014) |
| 37. | Monkeypox virus strain DRC 07-0480       | JX878427 | 197347 | 191 | 33.1 | Homo sapiens | Democratic Republic of the Congo           | 25-05-2007 | 14-Jan-14 | Emerging Infect. Dis. 20 (2), 232-239 (2014) |
| 38. | Monkeypox virus strain DRC 07-0514       | JX878428 | 197488 | 191 | 33.1 | Homo sapiens | Democratic Republic of the Congo           | 30-06-2007 | 14-Jan-14 | Emerging Infect. Dis. 20 (2), 232-239 (2014) |
| 39. | Monkeypox virus strain DRC 07-0662       | JX878429 | 196866 | 190 | 33.1 | Homo sapiens | Democratic Republic of the Congo           | 04-09-2007 | 14-Jan-14 | Emerging Infect. Dis. 20 (2), 232-239 (2014) |
| 40. | Monkeypox virus strain DRC Yandongi 1985 | KC257460 | 196487 | 198 | 33.1 | Homo sapiens | Democratic Republic of the Congo: Yandongi | 1985       | 20-Feb-13 | Emerging Infect. Dis. 19 (2), 237-245 (2013) |



|     |                                                  |          |        |     |      |              |                                         |           |           |                                                |
|-----|--------------------------------------------------|----------|--------|-----|------|--------------|-----------------------------------------|-----------|-----------|------------------------------------------------|
| 41. | Monkeypox virus strain Gabon-1988                | KJ642619 | 196546 | 177 | 33.1 | NA           | Gabon                                   | 1988      | 11-May-15 | Viruses 7 (4), 2168-2184 (2015)                |
| 42. | Monkeypox virus strain Ikubi                     | KJ642612 | 194744 | 177 | 33.1 | NA           | Zaire, Democratic Republic of the Congo | 1986      | 11-May-15 | Viruses 7 (4), 2168-2184 (2015)                |
| 43. | Monkeypox virus strain Israel_2018               | MN648051 | 197417 | 213 | 33   | Homo sapiens | Israel                                  | 04-Oct-18 | 09-Jan-20 | NA                                             |
| 44. | Monkeypox virus strain Ivory Coast 2012          | KJ136820 | 200035 | 210 | 33.1 | Wild Monkey  | Cote d'Ivoire: Tai National Park        | Mar-12    | 29-May-14 | Emerging Infect. Dis. 20 (6), 1009-1011 (2014) |
| 45. | Monkeypox virus strain Liberia_1970_184          | DQ011156 | 200256 | 198 | 33.1 | Homo sapiens | NA                                      | NA        | 28-Sep-05 | J. Gen. Virol. 86 (PT 10), 2661-2672 (2005)    |
| 46. | Monkeypox virus strain MPXV-M2940_FCT            | MT903337 | 197547 | 181 | 33   | Homo sapiens | Nigeria: FCT                            | NA        | 15-Sep-20 | J. Infect. Dis. (2020) In press                |
| 47. | Monkeypox virus strain MPXV-M2957_Lagos          | MT903338 | 197559 | 181 | 33   | Homo sapiens | Nigeria: Lagos State                    | NA        | 15-Sep-20 | J. Infect. Dis. (2020) In press                |
| 48. | Monkeypox virus strain MPXV-M3021_Delta          | MT903339 | 197556 | 181 | 33   | Homo sapiens | Nigeria: Delta State                    | NA        | 15-Sep-20 | J. Infect. Dis. (2020) In press                |
| 49. | Monkeypox virus strain MPXV-M5312_HM12_Rivers    | MT903340 | 197209 | 181 | 33   | Homo sapiens | Nigeria: Rivers State                   | NA        | 15-Sep-20 | J. Infect. Dis. (2020) In press                |
| 50. | Monkeypox virus strain MPXV-M5320_M15_Bayelsa    | MT903341 | 185309 | 182 | 33   | Homo sapiens | Nigeria: Bayelsa State                  | NA        | 15-Sep-20 | J. Infect. Dis. (2020) In press                |
| 51. | Monkeypox virus strain MPXV-Singapore            | MT903342 | 197309 | 181 | 33   | Homo sapiens | Singapore                               | NA        | 15-Sep-20 | J. Infect. Dis. (2020) In press                |
| 52. | Monkeypox virus strain MPXV-USA2003_099_Dormouse | MT903347 | 198780 | 181 | 33.1 | Dormouse     | USA                                     | NA        | 15-Sep-20 | J. Infect. Dis. (2020) In press                |

|     |                                                       |          |        |     |      |                      |                                  |      |           |                                              |
|-----|-------------------------------------------------------|----------|--------|-----|------|----------------------|----------------------------------|------|-----------|----------------------------------------------|
| 53. | Monkeypox virus strain MPXV-USA2003_099_Gambian_Rat   | MT903346 | 198778 | 181 | 33.1 | Cricetomys gambianus | USA                              | NA   | 15-Sep-20 | J. Infect. Dis. (2020) In press              |
| 54. | Monkeypox virus strain MPXV-USA2003_099_Rope_Squirrel | MT903348 | 198780 | 181 | 33.1 | Rope Squirrel        | USA                              | NA   | 15-Sep-20 | J. Infect. Dis. (2020) In press              |
| 55. | Monkeypox virus strain MPXV-WRAIR7-61                 | AY603973 | 199195 | 177 | 33.1 | NA                   | West Africa                      | NA   | 02-Sep-05 | Virology 340 (1), 46-63 (2005)               |
| 56. | Monkeypox virus strain Nigeria-SE-1971                | KJ642617 | 197551 | 176 | 33   | NA                   | Nigeria                          | 1971 | 11-May-15 | Viruses 7 (4), 2168-2184 (2015)              |
| 57. | Monkeypox virus strain PCH                            | KJ642616 | 198741 | 178 | 33.1 | NA                   | France: Paris                    | 1968 | 11-May-15 | Viruses 7 (4), 2168-2184 (2015)              |
| 58. | Monkeypox virus strain Sierra Leone                   | AY741551 | 198756 | 177 | 33.1 | NA                   | Sierra Leone                     |      | 07-Sep-05 | Virology 340 (1), 46-63 (2005)               |
| 59. | Monkeypox virus strain Sudan 2005_01                  | KC257459 | 206372 | 207 | 32.9 | Homo sapiens         | Sudan: Nuria                     | 2005 | 20-Feb-13 | Emerging Infect. Dis. 19 (2), 237-245 (2013) |
| 60. | Monkeypox virus strain USA_2003_039                   | DQ011157 | 198780 | 198 | 33.1 | Homo sapiens         | USA                              | NA   | 28-Sep-05 | J. Gen. Virol. 86 (PT 10), 2661-2672 (2005)  |
| 61. | Monkeypox virus strain USA_2003_044                   | DQ011153 | 198780 | 198 | 33.1 | Prairie Dog          | USA                              | NA   | 28-Sep-05 | J. Gen. Virol. 86 (PT 10), 2661-2672 (2005)  |
| 62. | Monkeypox virus strain UTC                            | KJ642614 | 190083 | 172 | 33   | NA                   | Netherlands: Rotterdam           | 1965 | 11-May-15 | Viruses 7 (4), 2168-2184 (2015)              |
| 63. | Monkeypox virus strain W-Nigeria                      | KJ642615 | 197792 | 176 | 33   | NA                   | Nigeria                          | 1978 | 11-May-15 | Viruses 7 (4), 2168-2184 (2015)              |
| 64. | Monkeypox virus strain Yambuku_DRC_1985               | KP849471 | 197248 | 188 | 33.1 | NA                   | Democratic Republic of the Congo | 1985 | 13-May-15 | Viruses 7 (4), 2168-2184 (2015)              |

|     |                                           |             |        |     |       |              |                                         |              |             |                                             |
|-----|-------------------------------------------|-------------|--------|-----|-------|--------------|-----------------------------------------|--------------|-------------|---------------------------------------------|
| 65. | Monkeypox virus strain Zaire_1979-005     | DQ011155    | 196967 | 202 | 33.1  | Homo sapiens | Zaire, Democratic Republic of the Congo | NA (1979???) | 28-Sep-05   | J. Gen. Virol. 86 (PT 10), 2661-2672 (2005) |
| 66. | Monkeypox virus strain Zaire 1979-005     | HM172544    | 196959 | 197 | 33.1  | Homo sapiens | Zaire, Democratic Republic of the Congo | NA (1979???) | 25-Jul-10   | Virol. J. 7, 110 (2010)                     |
| 67. | Monkeypox virus Zaire-96-I-16             | NC 003310.1 | 196858 | 207 | 33.09 | NA           | Zaire, Democratic Republic of the Congo | NA           | 20-Dec-20   | FEBS Lett. 509 (1), 66-70 (2001)            |
| 68. | Monkeypox virus MPX/UZ_REGA_1Belgium/2022 | ON622712    | 198010 | 211 | 32.9  | Homo sapiens | Belgium                                 | 19-May-2022  | 22-May-2022 | Unpublished                                 |
| 69. | Monkeypox virus MPX/UZ_REGA_2Belgium/2022 | ON622713    | 198016 | 211 | 32.9  | Homo sapiens | Belgium                                 | 22-May-2022  | 22-May-2022 | Unpublished                                 |
| 70. | Monkeypox virus MPXV_FRA_2022_TLS67       | ON602722.2  | 197103 | 219 | 33    | Homo sapiens | France                                  | May-2022     | 25-May-2022 | Unpublished                                 |
| 71. | Monkeypox virus MPXV_USA_2022_MA001       | ON563414    | 197205 | 211 | 33    | Homo sapiens | USA                                     | May-2022     | 30-May-2022 | Unpublished                                 |

A.

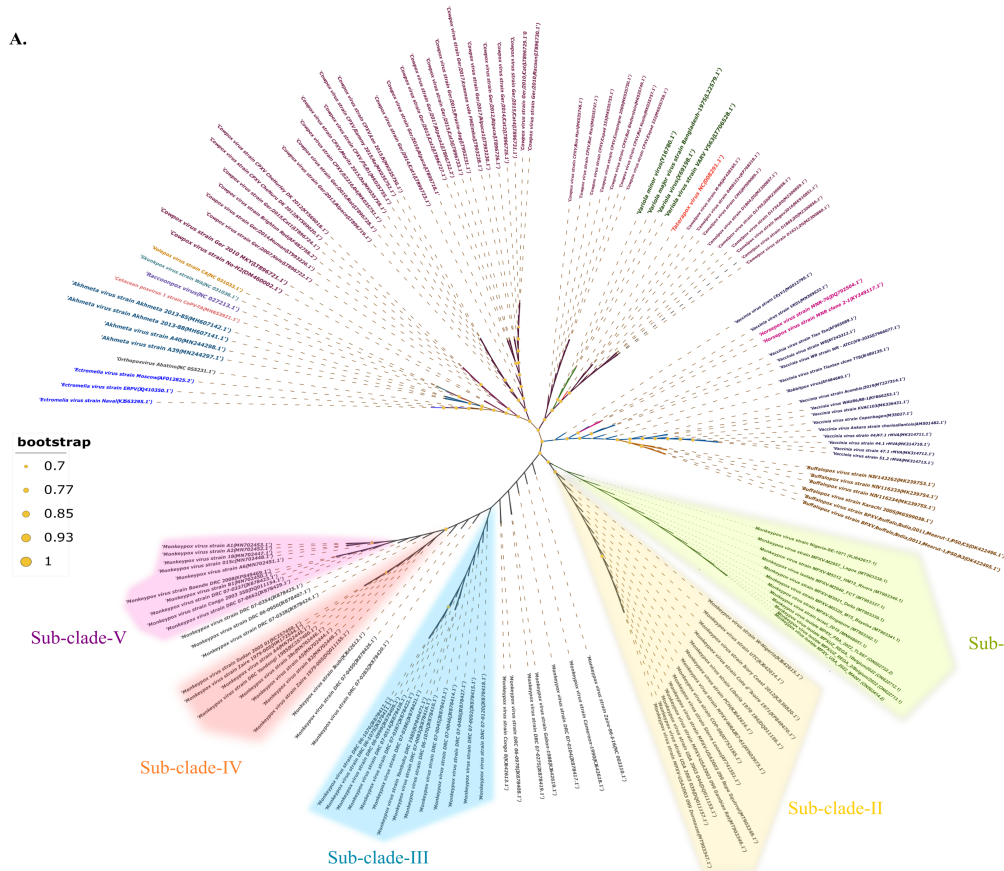

B.

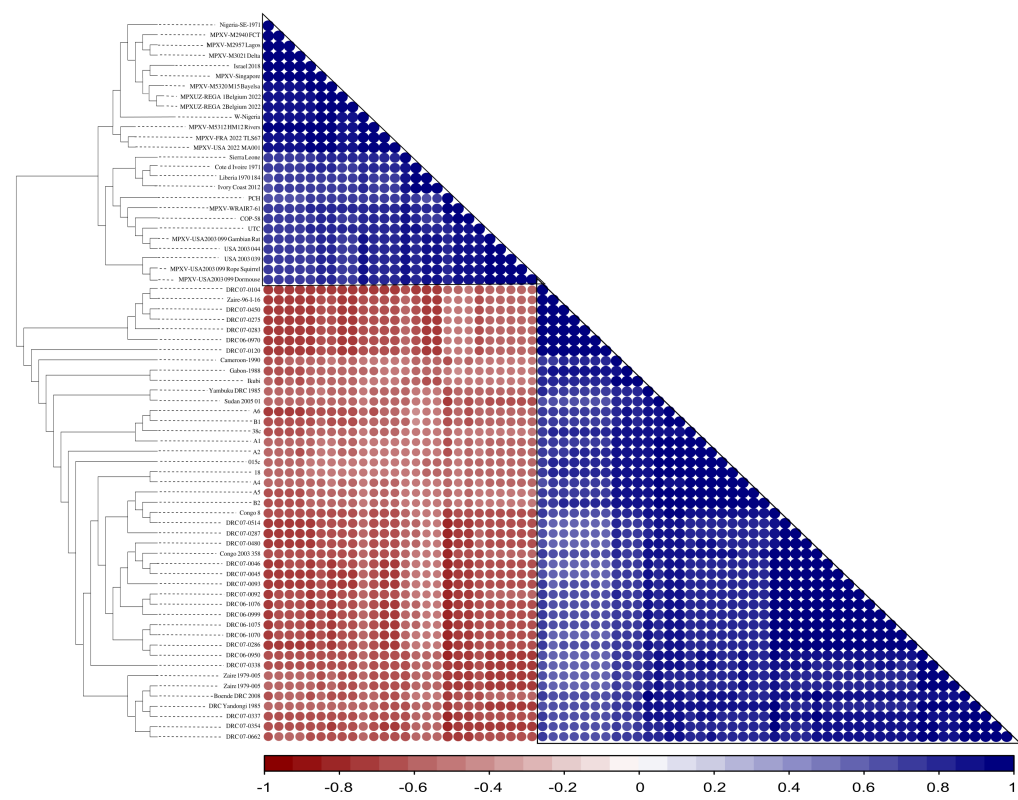



(A)

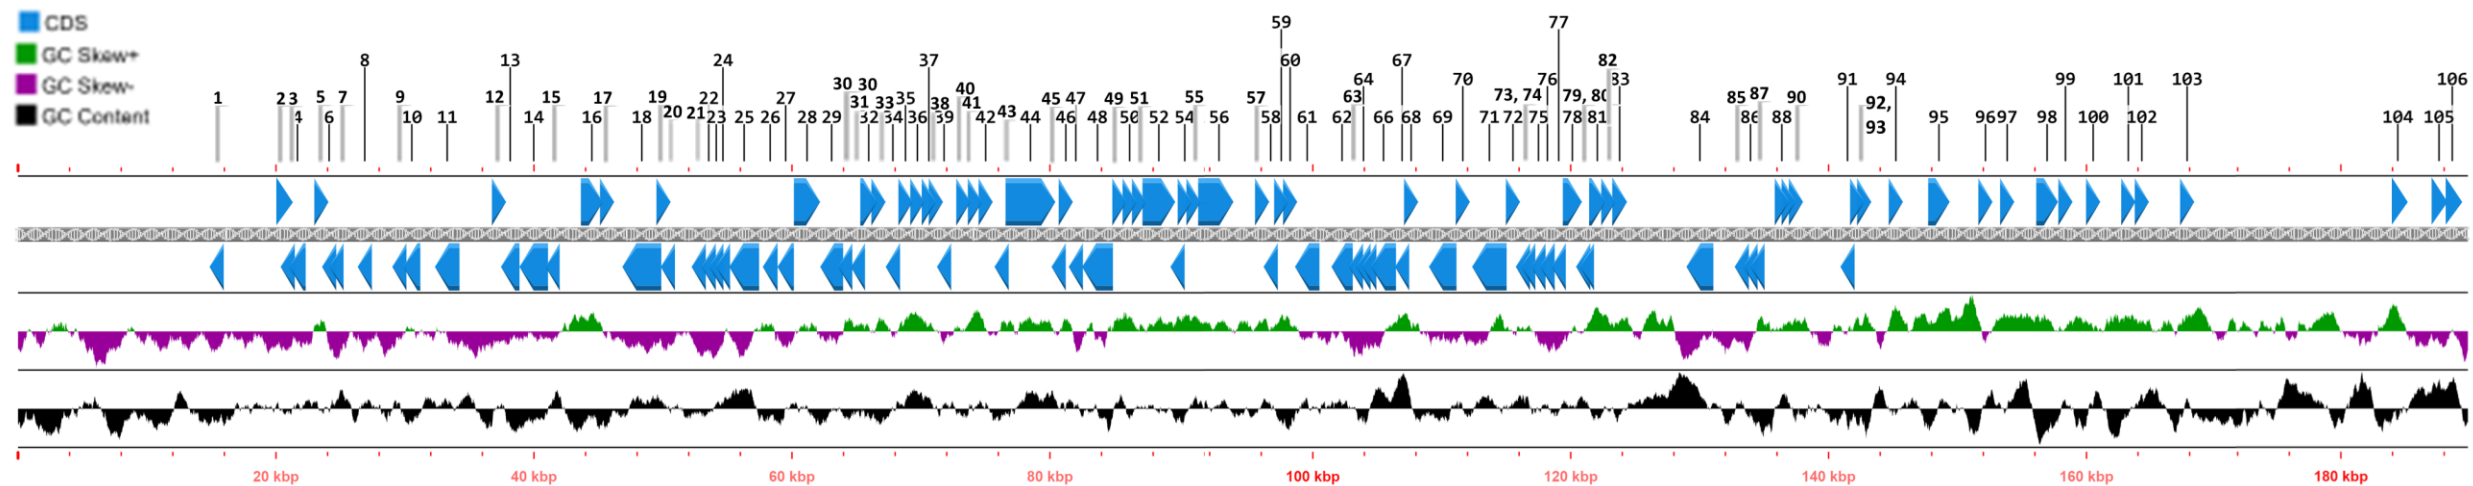

(B)

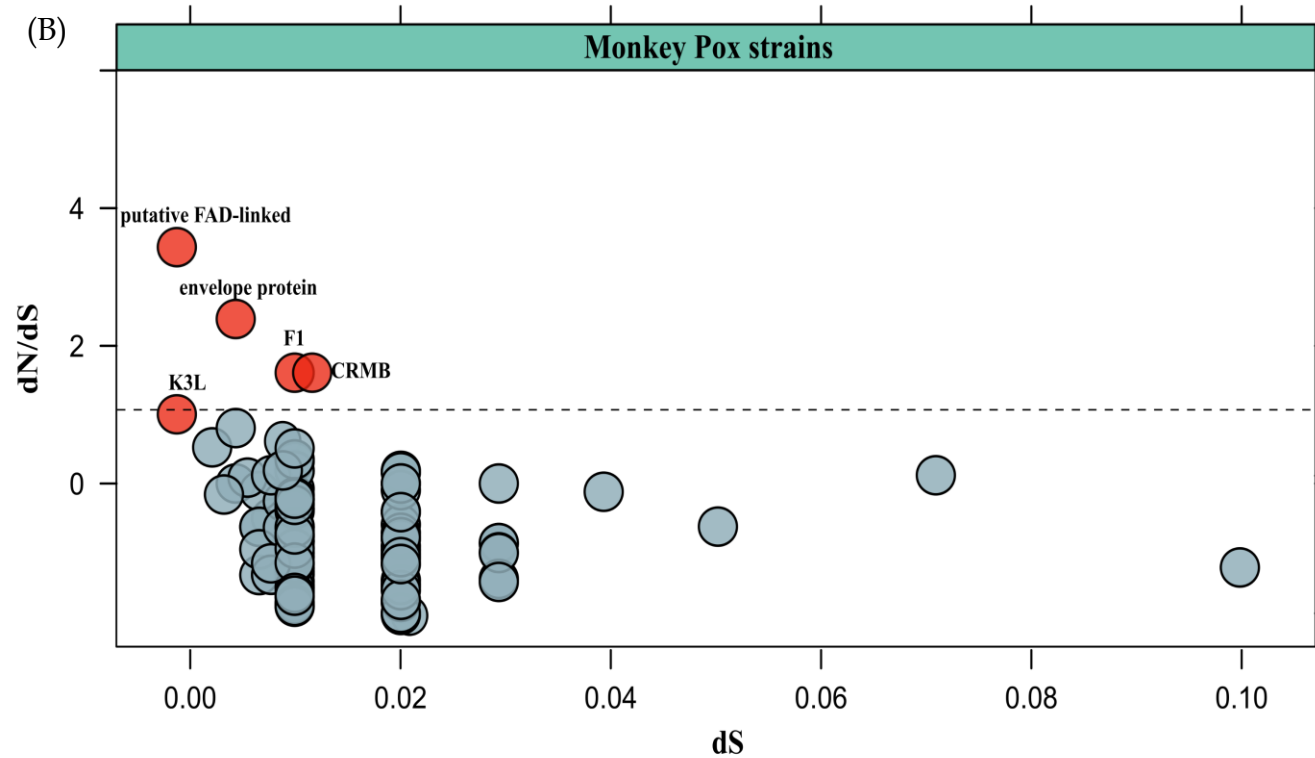

Figure 3

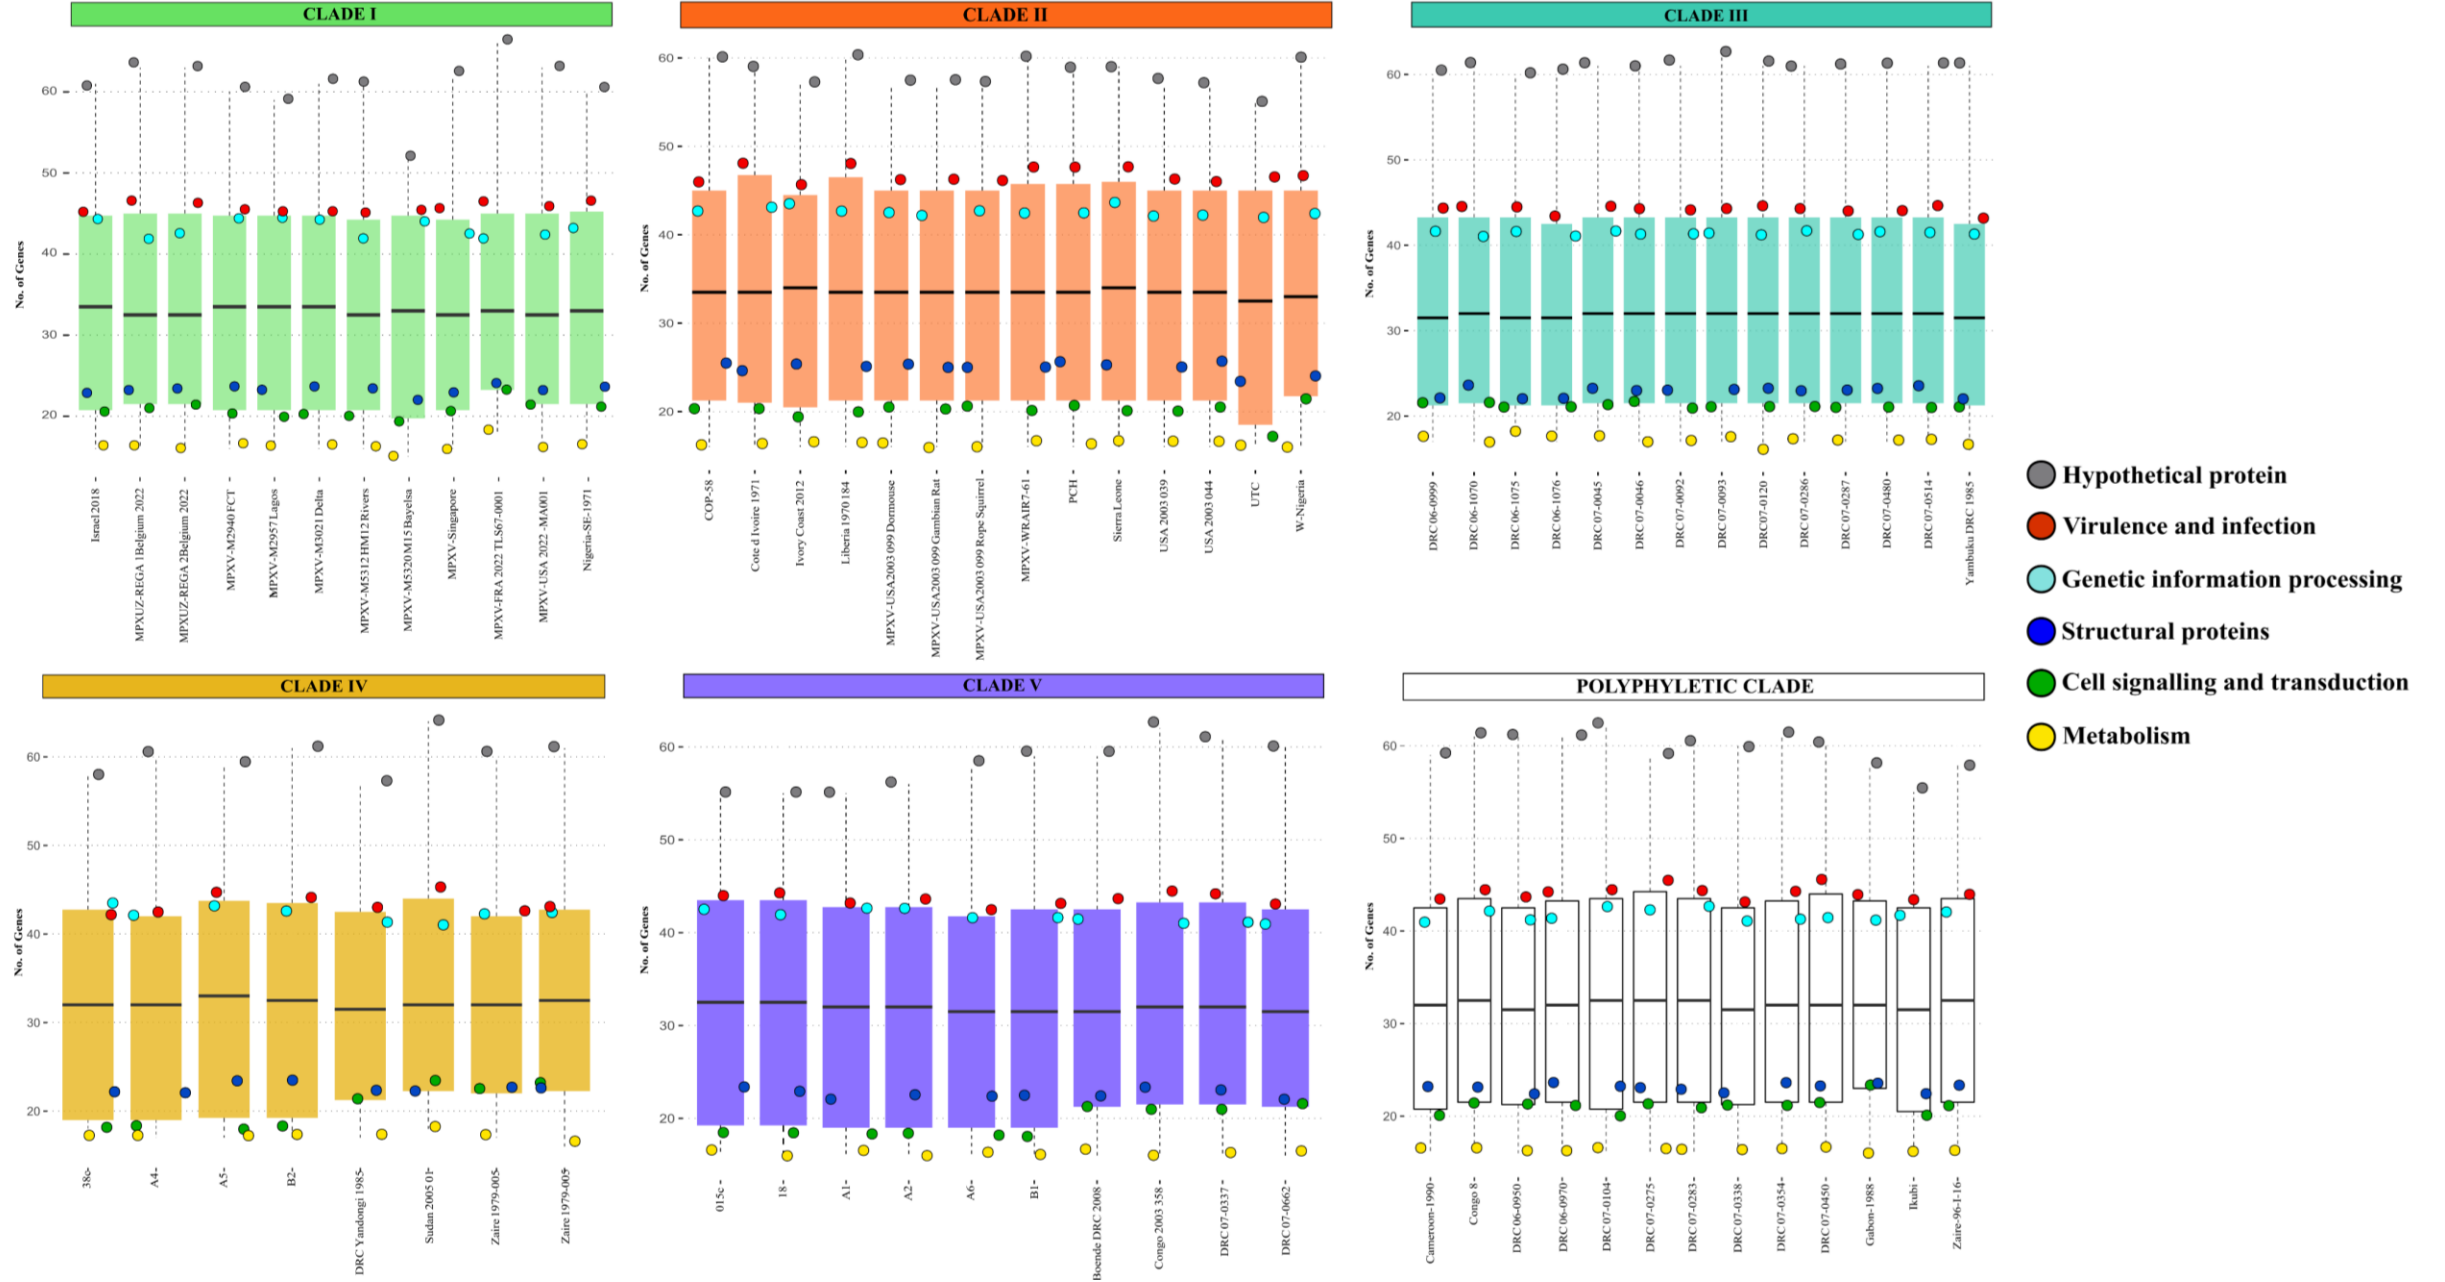

Figure 4

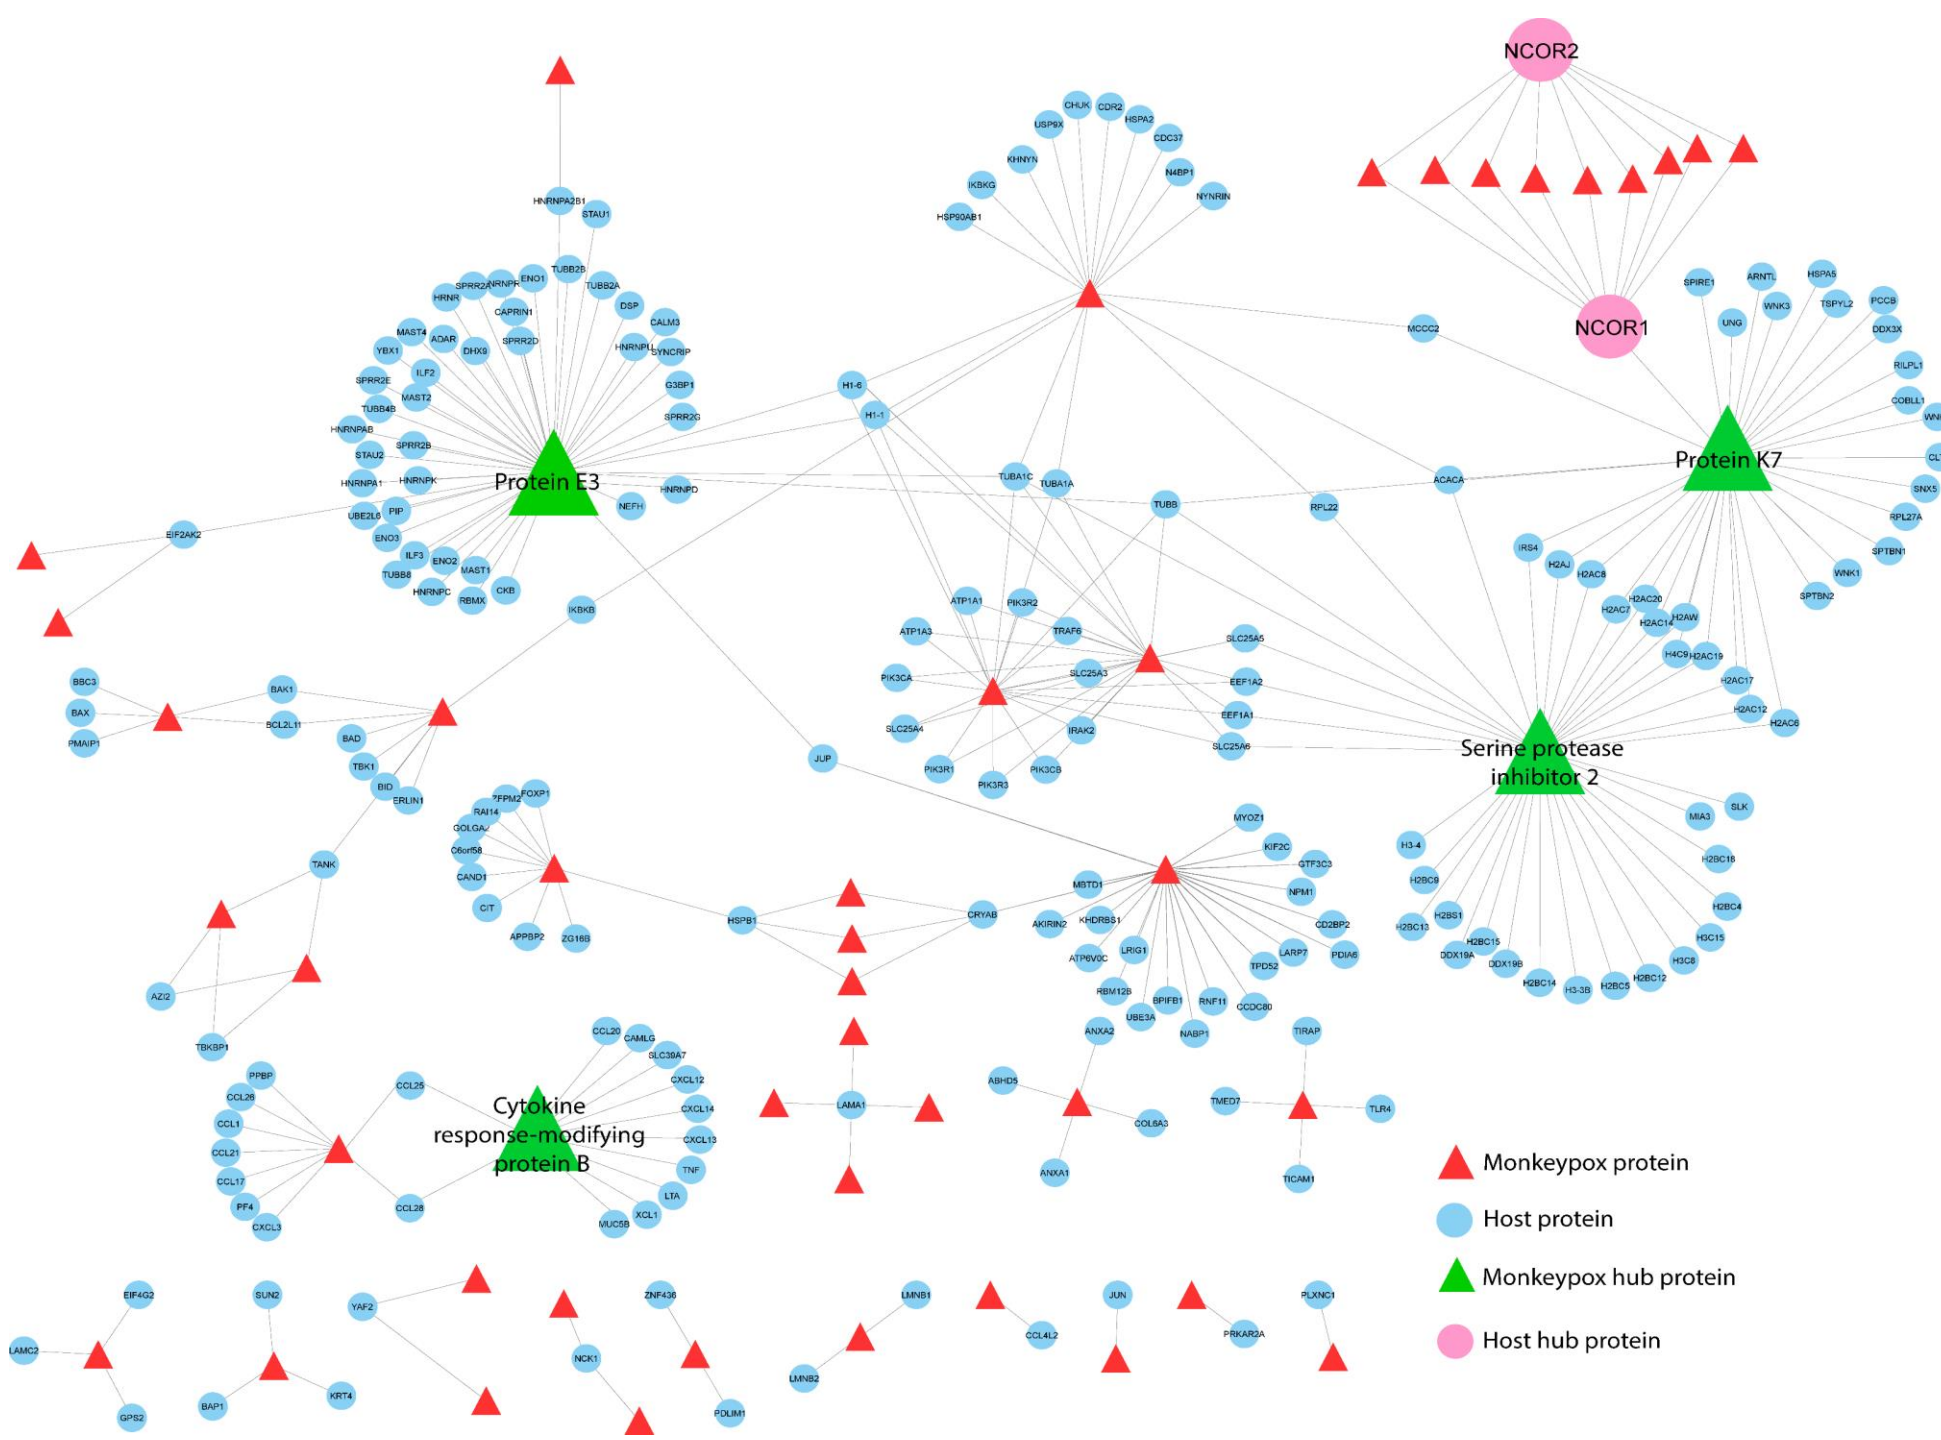

Figure 5



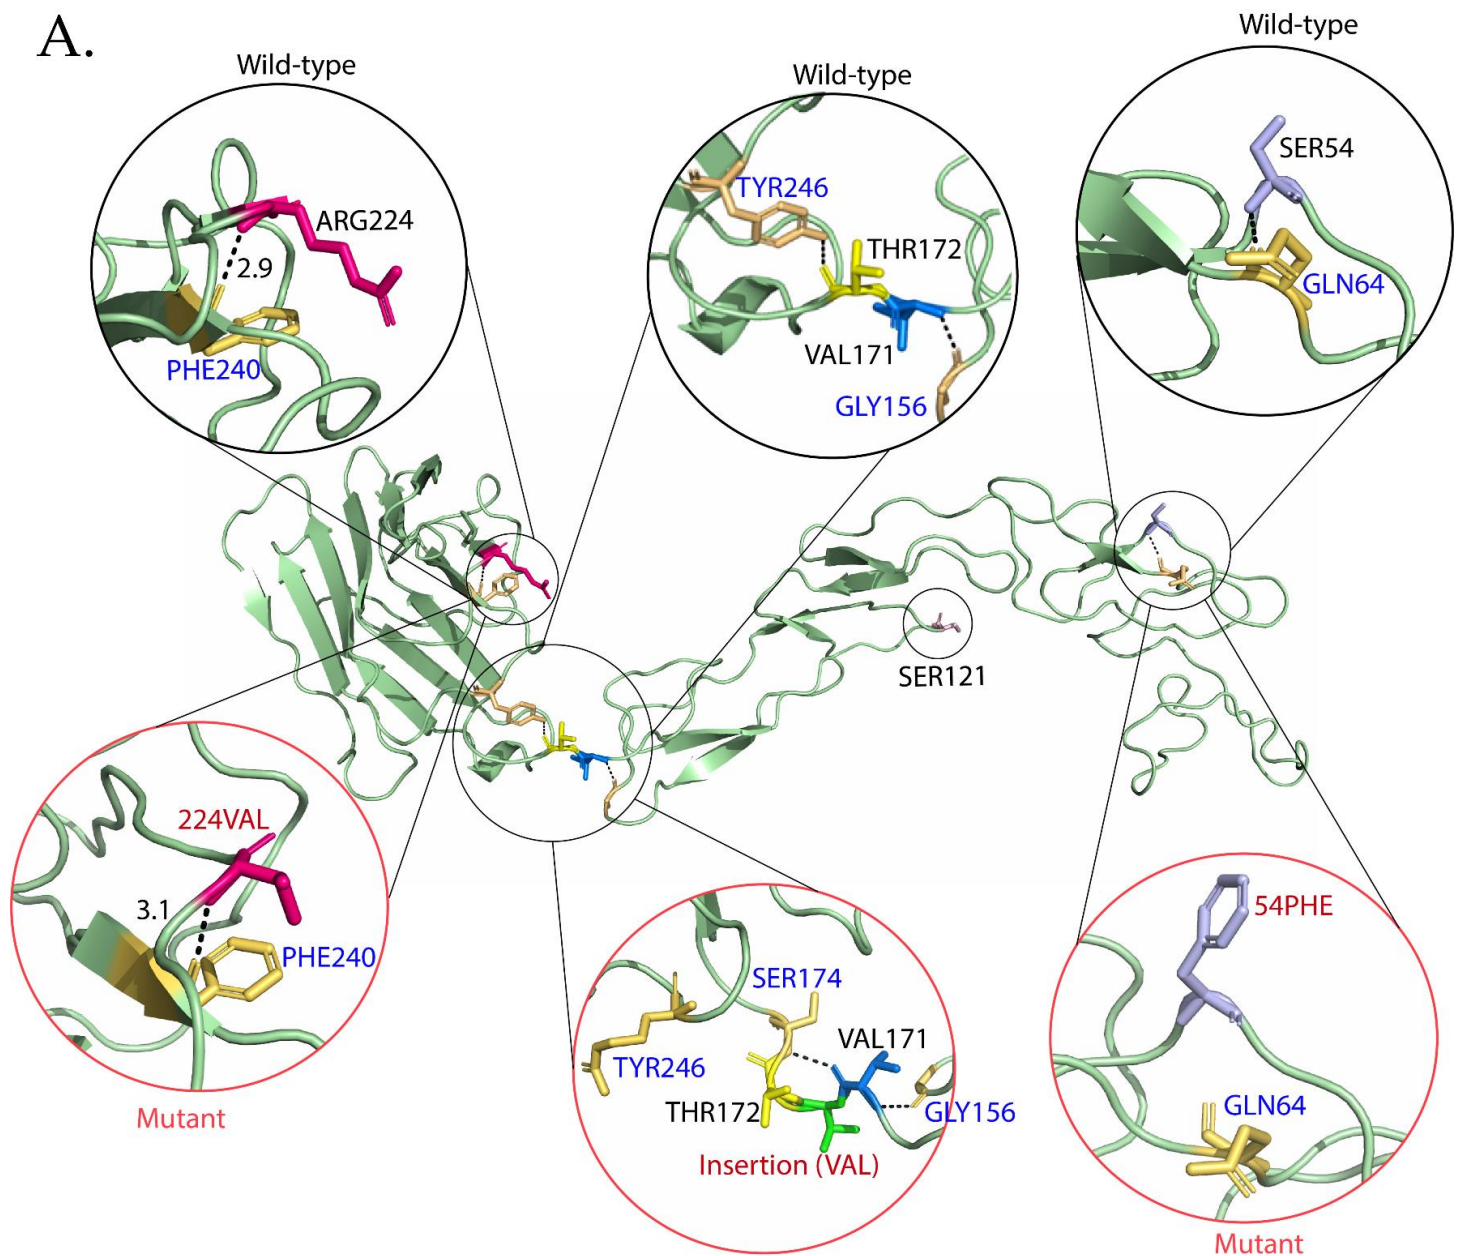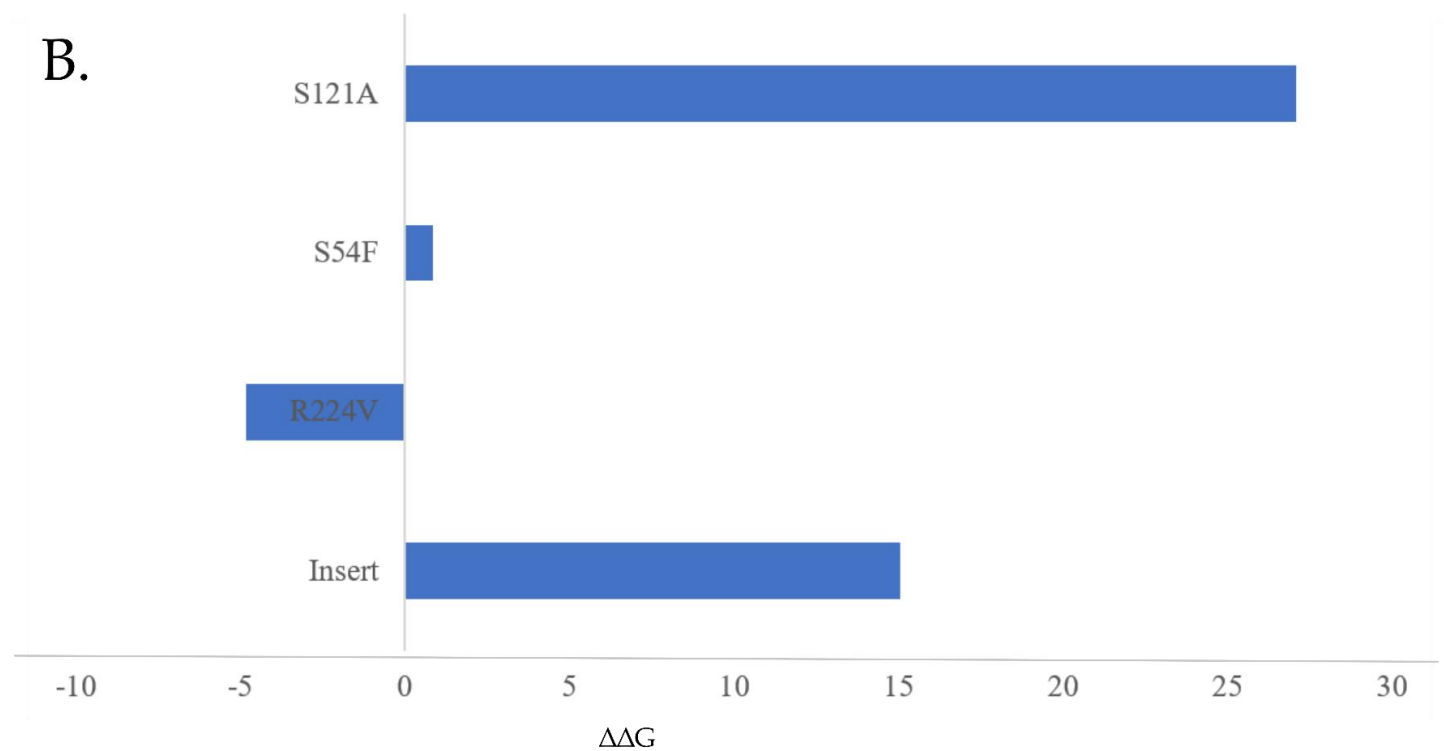

Figure 6
